# **Elys deficiency constrains Kras-driven tumour burden by amplifying oncogenic stress**

**Kimberly J Morgan<sup>1,2</sup>, Karen Doggett<sup>1,2</sup>, Fan-Suo Geng<sup>1,3</sup>, Lachlan Whitehead<sup>2,4</sup>, Kelly A  
Smith<sup>5,6</sup>, Benjamin M Hogan<sup>6,7</sup>, Cas Simons<sup>6,8</sup>, Gregory J Baillie<sup>6</sup>, Ramyar Molania<sup>2,9</sup>,  
Anthony T Papenfuss<sup>2,9</sup>, Thomas E Hall<sup>6</sup>, Elke A Ober<sup>10</sup>, Didier Y R Stainier<sup>11</sup>, Zhiyuan  
Gong<sup>12</sup> and Joan K Heath<sup>1,2,\*</sup>**

<sup>1</sup>Epigenetics and Development Division, Walter and Eliza Hall Institute of Medical Research, Parkville,  
Victoria 3052, Australia

<sup>2</sup>Department of Medical Biology, University of Melbourne, Parkville, Victoria 3010, Australia

<sup>3</sup>Genomics and Epigenetics Division, Garvan Institute of Medical Research, Darlinghurst, New South  
Wales, Australia and St Vincent's Clinical School, Faculty of Medicine, University of New South  
Wales, New South Wales 2010, Australia

<sup>4</sup>Centre for Dynamic Imaging, Advanced Technology and Biology Division, Walter and Eliza Hall  
Institute of Medical Research, Parkville, Victoria 3052, Australia

<sup>5</sup>Department of Physiology, The University of Melbourne, Parkville, Victoria 3010, Australia

<sup>6</sup>Institute for Molecular Biosciences, The University of Queensland, Brisbane, Queensland 4072,  
Australia

<sup>7</sup>Peter MacCallum Cancer Centre, Melbourne, Victoria 3000, Australia

<sup>8</sup>Murdoch Children's Research Institute, Parkville, Victoria 3052, Australia

<sup>9</sup>Bioinformatics Division, Walter and Eliza Hall Institute of Medical Research, Parkville, Victoria 3052,  
Australia

23 <sup>10</sup>Danish Stem Cell Center, University of Copenhagen, 2200 Copenhagen N, Denmark

24 <sup>11</sup>Max Planck Institute for Heart and Lung Research, Dept. III – Developmental Genetics

25 Ludwigstrasse 43, 61231 Bad Nauheim, Germany

26 <sup>12</sup>Department of Biological Science, National University of Singapore, Singapore

27 **\*Corresponding Author:** Joan K Heath, Walter and Eliza Hall Institute of Medical Research, 1G Royal

28 Parade, Parkville, Victoria 3052, Australia. Phone: (+613) 9345-2872

29 Email: [joan.heath@wehi.edu.au](mailto:joan.heath@wehi.edu.au)

30 **Declaration of interests:** The authors declare no potential conflicts of interest

31

32 **ABSTRACT**

33 The nucleoporin ELYS, encoded by *AHCTF1*, is a large multifunctional protein with essential roles in  
34 nuclear pore assembly and mitosis. Using a zebrafish model of hepatocellular carcinoma, in which  
35 the expression of an inducible mutant *kras* transgene (*kras<sup>G12V</sup>*) drives hepatocyte-specific  
36 hyperplasia and liver enlargement, we show that reducing *ahctf1* gene dosage by 50% markedly  
37 shrinks tumour burden, while non-hyperplastic tissues are unaffected. We demonstrate that *ahctf1*  
38 heterozygosity impairs nuclear pore formation, mitotic spindle assembly and chromosome  
39 segregation, leading to DNA damage and activation of TP53-dependent and independent  
40 mechanisms of cell death and cell cycle arrest. This selective vulnerability of cancer cells to mild  
41 disruption of Elys function uncovers a novel synthetic lethal interaction between *ahctf1* and  
42 oncogenic *kras* that could be exploited therapeutically. Heterozygous expression of both *ahctf1* and  
43 *ranbp2*, or treatment of heterozygous *ahctf1* larvae with the nucleocytoplasmic transport inhibitor,  
44 Selinexor, completely blocked *kras<sup>G12V</sup>*-driven hepatocyte hyperplasia, revealing promising avenues  
45 for combinatorial treatments.

## 46 INTRODUCTION

47 Synthetic lethality is the term used to describe the death of cells in response to co-existing  
48 disruptions in two different genes, neither of which is lethal alone. The phenomenon has emerged  
49 as a promising tool for cancer drug development<sup>1</sup>. The advantage of the approach lies in its capacity  
50 to induce the death of a vulnerable cell population, such as oncogene-expressing cancer cells, while  
51 healthy cells are unaffected. The approach has been validated in the clinic by the use of  
52 poly(adenosine diphosphate [ADP]-ribose) polymerase (PARP) inhibitors to treat tumours carrying  
53 mutations in the breast cancer susceptibility genes, *BRCA1/BRAC2*<sup>2</sup>, and its success has fuelled the  
54 search for other clinically relevant pairwise combinations. Particular effort has been directed  
55 towards identifying genes whose partial loss of function confers synthetic lethality in cancer cells  
56 containing hitherto 'undruggable' oncogene targets, such as mutant *KRAS*<sup>3,4</sup>. In this paradigm, the  
57 interacting gene is not mutated in cancer nor oncogenic in its own right; however, its function is  
58 essential to maintain the tumourigenic state, inspiring the concept of non-oncogene addiction<sup>5</sup>.

59 In this paper, we tested whether *AHCTF1* exhibits the properties of a mutant *KRAS* synthetic lethal  
60 interacting gene. *AHCTF1* encodes ELYS, a 252 kDa multidomain nucleoporin that was first  
61 discovered in mouse development where it was shown to be required for the proliferation and  
62 survival of inner mass cells<sup>6</sup>. Since then, ELYS has been studied in many model systems, including in a  
63 zebrafish development mutant (ti262)<sup>7</sup>, where we and others showed that homozygous inheritance  
64 of an ENU-induced nonsense mutation in *ahctf1* disrupted nuclear pore formation and caused  
65 catastrophic levels of cell death in highly proliferative cell compartments, such as the intestinal  
66 epithelium, while relatively quiescent tissues survived and remained healthy<sup>8,9</sup>.

67 That ELYS is selectively required by proliferating cells is not unexpected given the multiple roles it  
68 plays in the cell cycle (Fig. 1). As well as being a structural component of nuclear pore complexes  
69 (NPCs), ELYS is essential for their formation at the end of mitosis<sup>10-12</sup>. NPCs are huge (110 MDa)  
70 multi-subunit complexes comprising at least 30 different nucleoporins (Nups) in an octameric

71 array<sup>13</sup>. They form cylindrical channels in the nuclear envelope (NE) and regulate nucleocytoplasmic  
72 transport and intracellular localisation of large (>40 kDa) molecules. In the absence of ELYS, the NE is  
73 re-built at the end of mitosis but this occurs without NPC formation, precluding mRNAs and large  
74 proteins from moving in and out of the nucleus. By providing a platform for NPC re-assembly at the  
75 end of mitosis (Fig. 1a,b), ELYS restores nucleocytoplasmic trafficking, and thereby facilitates entry  
76 into the nucleus of proteins such as G1 and S phase cyclin-dependent kinases that are required for  
77 DNA replication and cell cycle progression (Fig. 1c). Also in G1/S phase, ELYS regulates transcription  
78 and DNA replication by reversible binding to components of the SWI/SNF 80 chromatin remodeller  
79 complex, PBAP, and the DNA replication origin licensing system, MCM2-7, respectively (Fig. 1d-  
80 f)<sup>11,12,14,15</sup>.

81 At the end of G2, the cell has grown to a critical size and is prepared for M phase (Fig. 1g). The NE  
82 breaks down (NEBD) and NPCs are disassembled (Fig. 1h). Whereas most Nups disperse throughout  
83 the cytoplasm and the endoplasmic reticulum (ER)<sup>16,17</sup>, ELYS, together with components of the  
84 Nup107-160 complex and RANBP2, play an important role in prophase by binding to the  
85 kinetochores of recently replicated sister chromatids where they contribute to microtubule  
86 recruitment and spindle assembly (Fig. 1i)<sup>18-20</sup>. At telophase, when the chromatids are fully  
87 separated, the spindle and kinetochores dissolve and ELYS becomes tethered to thousands of sites  
88 on chromatin through its C-terminal chromatin binding region where it promotes chromatin  
89 decondensation<sup>15,21</sup>. In G1, the N-terminal half of ELYS provides a scaffold to bind the Nup107-160  
90 complex and other ER-associated Nups, thereby coupling the initiation of NPC assembly with  
91 euchromatin formation, restoration of nucleocytoplasmic transport and transcription<sup>11,22,23</sup>.

92 Given this plethora of functions throughout the cell cycle, it is not surprising that ELYS is an Achilles'  
93 heel of highly proliferative cells<sup>8,9</sup>. To test whether this vulnerability extrapolates to cancer cells *in*  
94 *vivo*, we employed a highly tractable zebrafish model of hepatocellular carcinoma (HCC) in which  
95 hepatocyte hyperplasia and liver enlargement are driven by an inducible, hepatocyte-specific *EGFP-*  
96 *kras*<sup>G12V</sup> transgene<sup>24</sup>. In this study, we used two-photon microscopy to accurately quantitate liver

97 volume in the presence and absence of a single nonsense mutation in one allele of the *ahctf1*  
98 locus<sup>8,9</sup>. Remarkably, we observed a pronounced reduction in tumour burden in response to this  
99 mild (50%) reduction in *ahctf1* gene dosage, while the rest of the animal was unaffected. We further  
100 show that this selective vulnerability of oncogenic *kras*<sup>G12V</sup>-expressing liver cancer cells to *ahctf1*  
101 heterozygosity possesses the hallmarks of a synthetic lethal interaction that may be exploited  
102 therapeutically.

103

104 **RESULTS**

105 ***ahctf1* heterozygosity reduces tumour burden in a zebrafish *kras*<sup>G12V</sup>-driven model of**

106 **hepatocellular carcinoma**

107 In the zebrafish *kras*<sup>G12V</sup>-driven HCC model, the doxycycline-induced expression of a single *EGFP-*  
108 *kras*<sup>G12V</sup> transgene (genotype denoted *TO(kras*<sup>G12V</sup>*)*<sup>T/+</sup> between 2-7 days post-fertilisation (dpf) leads  
109 to the accumulation of a constitutively active, EGFP-tagged oncogenic form of Kras specifically in  
110 hepatocytes<sup>24</sup> (Fig. 2a). This forced expression of *EGFP-kras*<sup>G12V</sup> causes hepatocyte hyperplasia and a  
111 substantial increase in liver volume that can be quantified by two-photon microscopy. To investigate  
112 the role of Elys in a cancer setting, we introduced a mutant *ahctf1* allele (containing a nonsense  
113 mutation at codon 1319) from a zebrafish development mutant (*flo*<sup>ti262</sup>)<sup>7</sup> into the genome of this  
114 model. This resulted in a 57% reduction in *ahctf1* mRNA expression in *ahctf1*<sup>+/-</sup> larvae at 7 dpf (Fig.  
115 2b), indicating that the premature codon encoded by the nonsense mutation triggers nonsense  
116 mediated decay rather than expression of a truncated Elys protein.

117 To determine the effect of *ahctf1* heterozygosity (and other treatments) on normal liver cells, we  
118 used a control transgenic line, denoted *2-CLiP* (*2-Colour Liver Pancreas*), in which hepatocytes  
119 express dsRed fluorescence but no oncogenic transgene<sup>25</sup>. We found that the mean liver volume in 7  
120 dpf wildtype zebrafish larvae is  $1.95 \times 10^6 \pm 4.99 \times 10^4 \mu\text{m}^3$  (Fig. 2c,d). *ahctf1* heterozygosity had no  
121 significant impact on liver volume in this model, consistent with previous observations that *ahctf1*  
122 heterozygotes develop normally, reach sexual maturity, and exhibit a normal lifespan<sup>9</sup>.

123 Turning to the *TO(kras*<sup>G12V</sup>*)* model, we found that induced expression of oncogenic Kras<sup>G12V</sup> led to  
124 liver hyperplasia and a striking (4.1-fold) increase in liver volume to  $7.97 \times 10^6 \pm 1.21 \times 10^5 \mu\text{m}^3$ . This  
125 amounted to an increment in liver volume of approximately  $6.02 \times 10^6 \mu\text{m}^3$  over the course of 5 d,  
126 demonstrating the potency of the oncogenic *kras*<sup>G12V</sup> signal. Remarkably, the excess liver volume  
127 was reduced by 35% in livers of *ahctf1*<sup>+/-</sup>;*TO(kras*<sup>G12V</sup>*)*<sup>T/+</sup> larvae (down to  $5.92 \times 10^6 \pm 8.83 \times 10^4 \mu\text{m}^3$ ).  
128 These data demonstrate that a mild (50%) reduction in *ahctf1* gene dosage is sufficient to restrict

129 tumour burden in livers expressing oncogenic *kras*<sup>G12V</sup>, while having no effect on normal livers. These  
130 results demonstrate that reduced *ahctf1* expression is a selective vulnerability of cancer cells and  
131 identify a novel synthetic lethal interaction between *ahctf1* and *kras*<sup>G12V</sup>.

132 Robust and persistent overexpression of RAS oncoproteins is frequently associated with oncogene-  
133 induced stress comprising defects in DNA replication, DNA damage and genome instability. In the  
134 presence of wildtype TP53, this damage is limited by activation of TP53 transcription pathways that  
135 induce cell cycle arrest, senescence and apoptosis. To determine whether expression of *kras*<sup>G12V</sup>  
136 causes oncogene-induced stress and Tp53 activation in our model, we measured the levels of Tp53  
137 protein in pooled lysates of micro-dissected *TO(kras*<sup>G12V</sup>*)*<sup>+/+</sup> and *TO(kras*<sup>G12V</sup>*)*<sup>T/+</sup> livers and the remains  
138 of the larvae (Fig. 2e,f). No Tp53 signal was obtained from non-*kras*<sup>G12V</sup>-expressing livers or the body  
139 remains after liver removal. We detected a weak Tp53 signal in extracts of *ahctf1*<sup>+/+</sup>;*TO(kras*<sup>G12V</sup>*)*<sup>T/+</sup>  
140 livers, indicating that expression of the *kras*<sup>G12V</sup> oncogene alone elicited a weak Tp53 response. In  
141 contrast, a much stronger Tp53 signal (>3.5-fold) was detected in *ahctf1*<sup>+/-</sup>;*TO(kras*<sup>G12V</sup>*)*<sup>T/+</sup> livers,  
142 demonstrating a more severe level of stress in *ahctf1*<sup>+/-</sup> hepatocytes expressing oncogenic *kras*<sup>G12V</sup>  
143 than occurs in *ahctf1*<sup>+/+</sup> hepatocytes.

144 **Loss of Tp53 function enhances *kras*<sup>G12V</sup>-driven liver enlargement, which is partially alleviated by**  
145 ***ahctf1* heterozygosity**

146 To test whether activation of the Tp53 pathway was involved in reducing the volume of *kras*<sup>G12V</sup>-  
147 expressing livers on a heterozygous *ahctf1* background, we repeated the experiment in the absence  
148 of Tp53 function. Here, we utilised the zebrafish *tp53*<sup>e7</sup> or *tp53*<sup>M214K</sup> allele, which affects a conserved  
149 amino acid residue within a region of the Tp53 DNA-binding domain corresponding to a mutational  
150 hotspot in human cancer, producing a transactivation-dead Tp53 variant<sup>26</sup>. Abrogating Tp53 function  
151 by homozygous expression of this allele (which we denoted *tp53*<sup>m/m</sup>) in *ahctf1*<sup>+/+</sup>;*TO(kras*<sup>G12V</sup>*)*<sup>T/+</sup>  
152 larvae supported a further large increase (82%) in excess liver volume ( $1.25 \times 10^7 \pm 1.10 \times 10^5 \mu\text{m}^3$ )  
153 compared to livers on the *tp53*<sup>+/+</sup> background (Fig. 2g,h) (Supplementary Fig. 1-3). These data



154 indicate that Tp53 function normally restrains tumour growth and liver enlargement in this model.  
155 Nonetheless, the excess liver volume ( $9.82 \times 10^6 \pm 1.34 \times 10^5 \mu\text{m}^3$ ) on the *ahctf1*<sup>+/-</sup>  
156 ;*tp53*<sup>m/m</sup>; *TO(kras*<sup>G12V</sup>)<sup>T/+</sup> background was 35% less than on a wildtype *ahctf1* background, indicating  
157 that mildly disrupted *ahctf1* expression can reduce tumour burden, even in the complete absence of  
158 functional Tp53.

159 ***ahctf1* heterozygosity triggers cell death in *TO(kras*<sup>G12V</sup>)<sup>T/+</sup> hepatocytes that is partially Tp53-**  
160 **independent**

161 As expression of Tp53 was upregulated in *ahctf1*<sup>+/-</sup>; *TO(kras*<sup>G12V</sup>)<sup>T/+</sup> livers, we next determined  
162 whether the reduction in liver volume in heterozygous *ahctf1* larvae was due to the induction of a  
163 Tp53-dependent cell death response. To investigate this, we utilised a transgenic line, *Tg(actb2:SEC-*  
164 *Hsa.ANXA5-mKate2,cryaa:mCherry)*<sup>uq24rp</sup> (hereafter denoted *Annexin 5-mKate*) that constitutively  
165 expresses a fusion protein comprising Annexin 5 and the far-red fluorophore mKate<sup>27</sup>. This fusion  
166 protein identifies cells undergoing apoptosis by binding to phosphatidylserine that is normally  
167 inaccessible on the inner leaflet of the plasma membrane but is exposed as the membrane breaks  
168 down. This gives rise to discrete fluorescent puncta, which we captured using confocal imaging.

169 Annexin 5 fluorescent puncta were sparsely distributed (1.5 puncta per  $10^{-5} \mu\text{m}^3$ ) throughout the  
170 livers of *ahctf1*<sup>+/+</sup>; *tp53*<sup>+/+</sup>; *TO(kras*<sup>G12V</sup>)<sup>T/+</sup> larvae demonstrating that expression of *kras*<sup>G12V</sup> is  
171 associated with low levels of cell death (Fig. 3a,b). In marked contrast, the number of Annexin 5  
172 fluorescent objects was 3.5-fold higher (5.2 puncta per  $10^{-5} \mu\text{m}^3$ ) in the livers of *ahctf1*<sup>+/-</sup>  
173 ;*tp53*<sup>+/+</sup>; *TO(kras*<sup>G12V</sup>)<sup>T/+</sup> larvae demonstrating that the reduction in tumour burden observed in  
174 response to *ahctf1* heterozygosity is due, at least in part, to an increase in cell death (Fig. 3a,b left  
175 two columns). These results were recapitulated when the cleaved, (active form) of caspase 3 was  
176 used as an alternative marker of apoptosis (Supplementary Fig. 4). That cell death in hyperplastic  
177 hepatocytes is largely dependent on Tp53 function was demonstrated by negligible apoptosis in the  
178 livers of *ahctf1*<sup>+/+</sup>; *tp53*<sup>m/m</sup>; *TO(kras*<sup>G12V</sup>)<sup>T/+</sup> larvae (Fig. 3a,b right two columns). Again, the effect of

179 Tp53 loss was partially alleviated by *ahctf1* heterozygosity. We observed a 17.6-fold increase in the  
180 abundance of Annexin 5 fluorescent puncta in *tp53<sup>m/m</sup>;TO(kras<sup>G12V</sup>)<sup>T/+</sup>* livers on a heterozygous  
181 *ahctf1<sup>+/-</sup>* background, compared to livers on a *ahctf1<sup>+/+</sup>* background.

182 We showed that the elevated level of Tp53 protein observed in *ahctf1<sup>+/-</sup>;TO(kras<sup>G12V</sup>)<sup>T/+</sup>* livers,  
183 compared to *ahctf1<sup>+/+</sup>;TO(kras<sup>G12V</sup>)<sup>T/+</sup>* livers (Fig. 2e,f), was transcriptionally active by the upregulated  
184 (4.7-fold) mRNA expression of a canonical Tp53 target gene, *mdm2* (Fig. 3c). This prompted us to  
185 quantify the mRNA expression levels of a suite of Bcl2 family genes that regulate intrinsic  
186 (mitochondrial) apoptosis (Fig. 3c). Direct Tp53 transcriptional targets, *pmaip1* (aka *noxa*) and *bbc3*  
187 (aka *puma*), were both upregulated by >6.5-fold in *ahctf1<sup>+/-</sup>;tp53<sup>+/+</sup>;TO(kras<sup>G12V</sup>)<sup>T/+</sup>* livers compared to  
188 *ahctf1<sup>+/+</sup>;tp53<sup>+/+</sup>;TO(kras<sup>G12V</sup>)<sup>T/+</sup>* livers. mRNAs encoding the other BH3-only apoptosis effector  
189 proteins, Bim, Bid, Bik and Bad, and the pro-apoptotic executioner protein, Bax were also increased  
190 in *ahctf1<sup>+/-</sup>;tp53<sup>+/+</sup>;TO(kras<sup>G12V</sup>)<sup>T/+</sup>* livers compared to *ahctf1<sup>+/+</sup>;tp53<sup>+/+</sup>;TO(kras<sup>G12V</sup>)<sup>T/+</sup>* livers.

191 Meanwhile, transcripts encoding Bcl2 and Bclxl pro-survival proteins were significantly  
192 downregulated by *ahctf1* heterozygosity. In the absence of Tp53 function, *ahctf1* heterozygosity still  
193 increased the expression of these pro-apoptotic transcripts, albeit less markedly. All these data are  
194 consistent with induction of Tp53 target genes playing a major role in the cell death response to  
195 *ahctf1* heterozygosity in *kras<sup>G12V</sup>*-expressing livers. Notwithstanding this, *ahctf1* heterozygosity still  
196 promotes moderate levels of cell death concomitant with reduced tumour burden, even in the  
197 complete absence of Tp53 function.

### 198 ***ahctf1* heterozygosity restricts DNA replication in *TO(kras<sup>G12V</sup>)<sup>T/+</sup>* hepatocytes**

199 To explore whether the reduction in liver enlargement we observe in *ahctf1<sup>+/-</sup>;TO(kras<sup>G12V</sup>)<sup>T/+</sup>* larvae  
200 also involves impaired cell cycle progression, we used an EdU incorporation assay to identify cells in  
201 S phase (Fig. 4a). We observed 32% EdU-positive cells in the enlarged livers of  
202 *ahctf1<sup>+/+</sup>;tp53<sup>+/+</sup>;TO(kras<sup>G12V</sup>)<sup>T/+</sup>* larvae and >20% EdU-positive cells (32% reduction) in the livers of  
203 *ahctf1<sup>+/-</sup>;tp53<sup>+/+</sup>;TO(kras<sup>G12V</sup>)<sup>T/+</sup>* larvae (Fig. 4b,c). In Tp53 deficient larvae, liver volume was markedly

204 increased as expected (Fig. 4b) and there was a doubling in the percentage of EdU-positive cells  
205 (63% compared to 32%) (Fig. 4c). *ahctf1* heterozygosity reduced liver volume in both Tp53 proficient  
206 and deficient larvae (Fig. 4b), consistent with Fig. 2, and reduced the percentage of EdU-positive  
207 cells in both Tp53 proficient (22% compared to 32%) and Tp53 deficient larvae (53% compared to  
208 63%) (Fig. 4c). These data indicate that the overall reduction in liver tumour burden we observe in  
209 response to *ahctf1* heterozygosity is due to reduced numbers of cycling cells and increased numbers  
210 of apoptotic cells.

211 To investigate this further, we performed RT-qPCR analysis of the negative cell cycle regulators,  
212 *cdkn1a* and *cdkn2a/b* in the presence and absence of Tp53. We found that *cdkn1a* and *cdkn2a/b*,  
213 encoding p21 and p16, respectively, were upregulated in *ahctf1*<sup>+/-</sup>;*tp53*<sup>+/+</sup>;*TO(kras*<sup>G12V</sup>*)*<sup>T/+</sup> livers  
214 compared to *ahctf1*<sup>+/+</sup>;*tp53*<sup>+/+</sup>;*TO(kras*<sup>G12V</sup>*)*<sup>T/+</sup> livers (Fig. 4d). For *cdkn1a*, this response to *ahctf1*  
215 heterozygosity was partially dependent on intact Tp53 function. However, while the level of  
216 *cdkn2a/b* mRNA expression was increased in response to *ahctf1* heterozygosity in  
217 *tp53*<sup>+/+</sup>;*TO(kras*<sup>G12V</sup>*)*<sup>T/+</sup> livers, in this case there was no response to *ahctf1* heterozygosity in  
218 *tp53*<sup>m/m</sup>;*TO(kras*<sup>G12V</sup>*)*<sup>T/+</sup> livers. This is consistent with *cdkn2a/b* expression being regulated solely by  
219 Tp53. To understand the basis for the beneficial effects on tumour burden by *ahctf1* heterozygosity  
220 in the absence of Tp53, we investigated the impact of *ahctf1* heterozygosity on the expression of  
221 *tp53* family members, *tp63* and *tp73*. We found that *tp63* and *tp73* mRNA expression was up-  
222 regulated by 3.0-fold and 2.3-fold, respectively in *ahctf1*<sup>+/-</sup>;*tp53*<sup>+/+</sup>;*TO(kras*<sup>G12V</sup>*)*<sup>T/+</sup> livers, compared to  
223 *ahctf1*<sup>+/+</sup>;*tp53*<sup>+/+</sup>;*TO(kras*<sup>G12V</sup>*)*<sup>T/+</sup> livers. Interestingly, the expression of *tp63* and *tp73* was upregulated  
224 by almost the same amount in *ahctf1*<sup>+/+</sup>;*tp53*<sup>m/m</sup>;*TO(kras*<sup>G12V</sup>*)*<sup>T/+</sup> livers and this was further enhanced  
225 by *ahctf1* heterozygosity (Fig. 4e). These data suggest that in response to *ahctf1* heterozygosity,  
226 Tp63 and Tp73, like Tp53, may be capable of promoting *cdkn1a* expression to induce cell cycle arrest  
227 even in the absence of functional Tp53. Taken together, the data shown in Figs. 3 and 4 show that  
228 *ahctf1* heterozygosity constrains *kras*<sup>G12V</sup>-driven hepatocyte hyperplasia and liver enlargement by a

229 mechanism that results in activation of Tp53 family proteins and initiation of transcriptional  
230 programs that induce cell cycle arrest and cell death.

231 ***ahctf1* heterozygosity disrupts the abundance of nuclear pore complexes in *TO(kras<sup>G12V</sup>)<sup>T/+</sup>***  
232 **hepatocytes.**

233 To determine how *ahctf1* heterozygosity leads to Tp53 activation, we examined the integrity of  
234 some of the essential processes in which the Elys protein plays a role. As depicted in Fig. 1, Elys fulfils  
235 many distinct functions during the cell cycle. Starting with post-mitotic nuclear pore assembly (Fig.  
236 1a), we used confocal laser-scanning microscopy with Airyscan to look at the abundance and  
237 distribution of NPCs in thick sections of liver (200  $\mu$ m) stained with an antibody (mAb414) that  
238 recognises FG-repeat Nups (Nup358, 214, 153 and 62) in mature NPCs. Non-*kras<sup>G12V</sup>* expressing  
239 hepatocytes exhibited fluorescent puncta corresponding to NPCs at the nuclear rim with negligible  
240 staining in the cytoplasm, a pattern that was unaffected by *ahctf1* genotype (Fig. 5a; left two  
241 columns). Upon induction of expression of the *TO(kras<sup>G12V</sup>)<sup>T/+</sup>* transgene, fluorescence intensity was  
242 markedly increased in the presence of wildtype *ahctf1* (Fig 5a, third column) and there was an  
243 increase in the ratio of nuclear:cytoplasmic staining (Fig 5b). This pattern was different in  
244 hepatocytes on a heterozygous *ahctf1* background. Notably, fluorescence intensity at the nuclear  
245 rim was partially diminished and this was concomitant with the appearance of puncta in the  
246 cytoplasm (Fig. 5a, fourth column; arrows). This apparent reduction in proper NPC assembly resulted  
247 in a 21% reduction in the ratio of nuclear:cytoplasmic fluorescence intensity in liver sections (Fig.  
248 5b).

249 To determine the abundance of NPCs, we analysed images acquired at the nuclear surface (Fig. 5c).  
250 The pattern and density of fluorescent puncta observed at the nuclear surface of non-*kras<sup>G12V</sup>*  
251 expressing hepatocytes was not affected by *ahctf1* genotype (Fig. 5c; left two columns). We found  
252 59% more fluorescent puncta/NPCs at the nuclear surface of hyperplastic hepatocytes expressing  
253 *kras<sup>G12V</sup>* in the presence of wildtype *ahctf1*. This *kras<sup>G12V</sup>*-driven increase in NPCs was reduced by 20%

254 in response to *ahctf1* heterozygosity (Fig. 5c, d; right two columns). We also observed that induced  
255 *kras*<sup>G12V</sup> expression produced a 28% increase in nuclear volume compared to non-*kras*<sup>G12V</sup> expressing  
256 cells (Fig. 5e), which was reduced to a 13% increase in the context of *ahctf1* heterozygosity.  
257 Together, these data indicate that hyperplastic hepatocytes expressing the *kras*<sup>G12V</sup> oncogene  
258 contain more abundant nuclear pores and larger nuclei than their non-*kras*<sup>G12V</sup> expressing  
259 counterparts. While these properties will facilitate nucleocytoplasmic trafficking and be of great  
260 benefit towards meeting the transcriptional and translational needs of rapidly cycling cancerous  
261 cells, we found that they could not be fully sustained on a *ahctf1*<sup>+/-</sup> background.

262 ***ahctf1* heterozygosity impairs mitotic spindle assembly and chromosome segregation in**  
263 ***TO(kras*<sup>G12V</sup>*)*<sup>T/+</sup> hepatocytes**

264 Next, we examined the impact of reduced Elys expression on spindle formation and chromosome  
265 segregation (Fig. 1b). We assessed these features in cryosections of liver using  $\alpha$ -tubulin and DAPI to  
266 stain microtubules and chromatin, respectively. Metaphase cells in *ahctf1*<sup>+/+</sup>;*TO(kras*<sup>G12V</sup>*)*<sup>T/+</sup> livers  
267 exhibited normal bipolar spindle formation followed by complete chromosome segregation during  
268 anaphase (Fig. 6a). In contrast, metaphase cells in *ahctf1*<sup>+/-</sup>;*TO(kras*<sup>G12V</sup>*)*<sup>T/+</sup> hepatocytes displayed  
269 abnormal multipolar spindles and misaligned chromosomes (Fig. 6b). Proper chromosome  
270 segregation was disrupted with multiple anaphase bridges formed. While the distribution of cells  
271 observed at different mitotic stages was similar in *ahctf1*<sup>+/+</sup> and *ahctf1*<sup>+/-</sup> hepatocytes (Fig. 6c),  
272 mitotic abnormalities were observed in 50% of *ahctf1*<sup>+/-</sup>;*TO(kras*<sup>G12V</sup>*)*<sup>T/+</sup> hepatocytes during  
273 metaphase and anaphase but not at all in *ahctf1*<sup>+/+</sup>;*TO(kras*<sup>G12V</sup>*)*<sup>T/+</sup> hepatocytes (Fig. 6d). Taken  
274 together, these data suggest that hyperplastic hepatocytes require a full complement of *ahctf1*  
275 expression to maintain proper cell division.

276 ***ahctf1* heterozygosity causes DNA damage in *TO(kras*<sup>G12V</sup>*)*<sup>T/+</sup> hepatocytes**

277 So far, our results demonstrate that a 50% decrease in *ahctf1* expression has multiple impacts in  
278 *TO(kras*<sup>G12V</sup>*)*<sup>T/+</sup> hepatocytes, including disrupted NPC assembly, impaired mitotic spindle assembly

279 and incomplete chromosome segregation, consistent with oncogene-induced stress. As several of  
280 these defects can converge to produce DNA damage, we looked for evidence of DNA damage by  
281 staining cryosections of liver with DAPI and  $\gamma$ -H2AX to mark DNA double-stranded breaks (Fig. 7a,b).  
282 We found that while only 1% of *ahctf1*<sup>+/+</sup>;*TO(kras*<sup>G12V</sup>*)*<sup>T/+</sup> hepatocyte nuclei were positive for  $\gamma$ -H2AX  
283 (Fig. 7c), 6% of *ahctf1*<sup>+/+</sup>;*TO(kras*<sup>G12V</sup>*)*<sup>T/+</sup> hepatocyte nuclei were  $\gamma$ -H2AX-positive. Collectively, these  
284 data show that the proper functioning of diverse cellular processes in hyperplastic hepatocytes  
285 depends on wildtype levels of *ahctf1* expression. We conclude from this that insufficient Elys protein  
286 in rapidly cycling cells produces multiple disruptive events that combine to produce elevated levels  
287 of oncogene-induced stress and DNA damage, in so doing providing the stimulus to activate Tp53  
288 and transcriptional programs that trigger cell cycle arrest and apoptosis.

### 289 **Combinatorial approaches can completely restrict *kras*<sup>G12V</sup>-driven liver hyperplasia**

290 Having determined that heterozygous *ahctf1* mutation is effective in restricting *kras*<sup>G12V</sup>-driven  
291 hepatocyte hyperplasia and liver enlargement, we investigated the potential of targeting cancer via  
292 another nucleoporin, Ranbp2, in our zebrafish model of HCC. RANBP2 (also known as NUP358) is a  
293 major component of the cytoplasmic filaments of NPCs, where it functions in numerous transport  
294 pathways. Like ELYS, RANBP2 also plays non-canonical roles outside of the NPC, including in mitotic  
295 progression and the maintenance of genome integrity<sup>28-30</sup>. In colon cancer cells with an activated  
296 BRAF signature, RANBP2 silencing reduces microtubule outgrowth from kinetochores, inducing  
297 spindle perturbations and cell death, the frequency of which can be exacerbated by treatment with  
298 microtubule inhibitors<sup>31</sup>.

299 We identified our zebrafish *ranbp2* mutant in a transgene assisted ENU-mutagenesis screen for  
300 mutations affecting endodermal organ morphogenesis<sup>32</sup> and showed, using whole genome  
301 sequencing and homozygosity mapping<sup>33,34</sup>, that the underlying mutation was a nonsense mutation  
302 in *ranbp2* (Supplementary Fig. 5). Like several other mutants we identified in this screen<sup>8,35,36</sup>,

303 mutant *ranbp2* larvae exhibit morphological deficiencies in proliferative compartments, including  
304 the developing intestinal epithelium, craniofacial complex and eye (Supplementary Fig. 5).

305 We found that *ranbp2* heterozygosity alone or in combination with *ahctf1* heterozygosity did not  
306 impact on liver volume in *2-CLiP* larvae (Fig. 8a,b). In *TO(kras<sup>G12V</sup>)<sup>T/+</sup>* larvae, liver volume was  
307 increased 3.8-fold, as observed previously, and the excess liver volume was reduced by 38% and 13%  
308 by the introduction of a single mutation in *ahctf1* or *ranbp2*, respectively (Fig. 8b). Remarkably, we  
309 found a striking synergistic benefit of trans heterozygosity in *ranbp2<sup>+/-</sup>;ahctf1<sup>+/-</sup>;TO(kras<sup>G12V</sup>)<sup>T/+</sup>*  
310 larvae, to the extent that liver volume was no longer distinguishable from that of normal *2-CLiP*  
311 livers. These results show that cancer cells are highly susceptible to combinatorial targeting of Nup  
312 function and that it may be possible to exploit this vulnerability to produce highly beneficial  
313 outcomes without impacting negatively on healthy tissues.

314 To examine this concept in a therapeutic context, we assessed the effect of Selinexor, a selective  
315 inhibitor of nuclear export (SINE) in our *kras<sup>G12V</sup>*-driven liver hyperplasia model. Selinexor is an XPO1  
316 (exportin) inhibitor with FDA approval for the treatment of refractory or relapsed multiple myeloma  
317 and diffuse large B-cell lymphoma and is in clinical trials for several other cancers, including HCC<sup>37,38</sup>.  
318 While we observed no reduction in liver volume in *2-CLiP* larvae exposed to 0.10-2.00  $\mu$ M Selinexor  
319 from 5 to 7 dpf (Fig. 8c,d) (Supplementary Fig. 6), *ahctf1<sup>+/-</sup>;TO(kras<sup>G12V</sup>)<sup>T/+</sup>* larvae exhibited a dose-  
320 dependent reduction in liver volume when exposed to Selinexor. Strikingly, liver volume was  
321 reduced even further in the context of *ahctf1* heterozygosity, such that at a 1.00  $\mu$ M dose of  
322 Selinexor, *kras<sup>G12V</sup>*-driven hepatocyte hyperplasia was completely blocked and liver volume was  
323 indistinguishable from that of normal, non-hyperplastic *2-CLiP* larvae (Fig. 8c,d). These results  
324 indicate that XPO1 inhibition is an effective suppressor of growth and proliferation in our model of  
325 mutant Kras-driven HCC, and that its effect is even more impressive when combined with a mild  
326 reduction in the expression of the nucleoporin, Elys.

327 We next examined whether there was any clinical rationale for developing Nup inhibitors for the  
328 purpose of cancer treatment. We analysed the survival data of HCC patients (Fig. 8e) collated in the  
329 cBioPortal for Cancer Genomics<sup>39,40</sup> in the context of Nup gene expression (Supplementary Table 3).  
330 Median overall survival of patients with high mRNA expression of components of the NUP107-160  
331 complex, including ELYS is 21.70 months, whereas the survival of patients with low expression of  
332 mRNAs encoding NUP107-160 components is markedly extended to 81.73 months. To be confident  
333 of the integrity of this striking result, we investigated whether the gene expression values in the  
334 TCGA liver hepatocellular carcinoma (LIHC) dataset were subject to batch effects and unwanted  
335 variation, noting that the 372 samples in the LIHC dataset were profiled across 19 sequencing plates.  
336 To do this, we performed ANOVAs to assess the effects of individual sequencing plates on the  
337 expression of genes encoding components of the NUP107-160 complex (Supplementary Fig. 7).  
338 These analyses revealed that differences in gene expression observed between samples were largely  
339 unaffected by unwanted variation between sequencing plates.

340



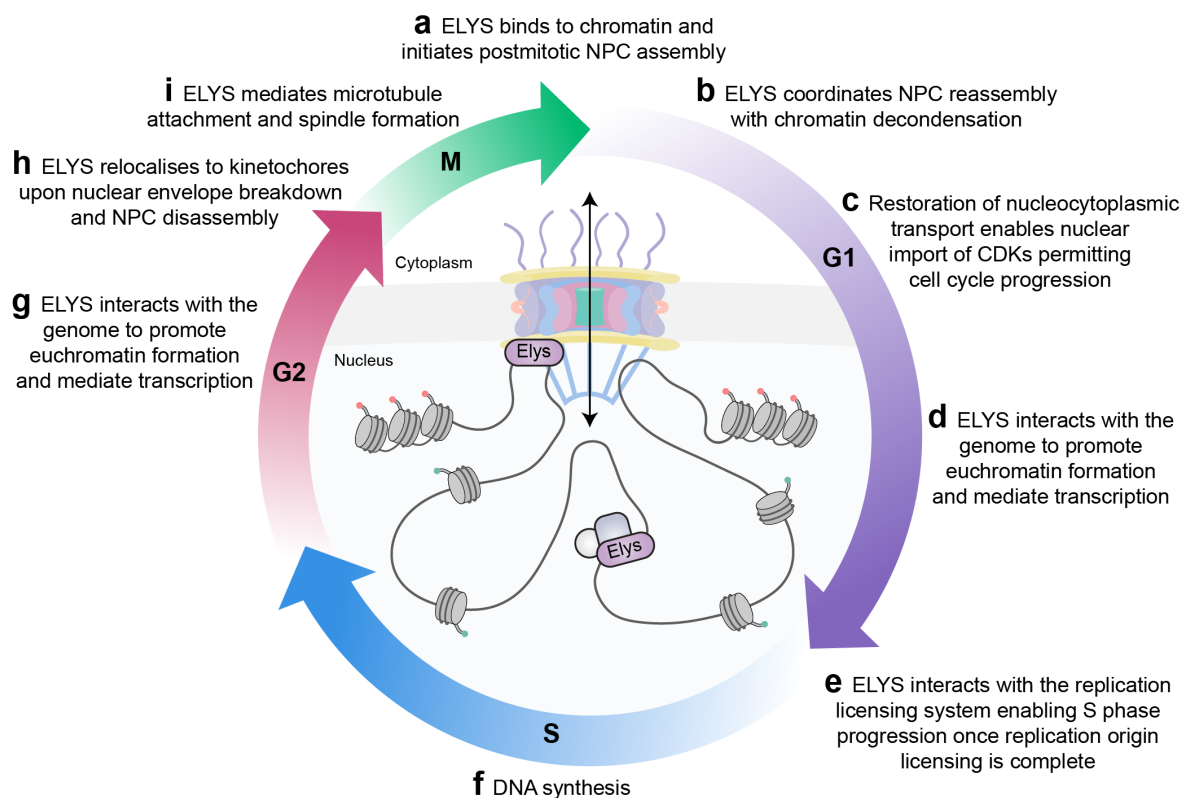

341

342 **Fig. 1 Elys plays critical roles at several stages of the cell cycle.**

343 Elys is a central player in multiple diverse cellular processes far beyond its canonical role in **a, b.**

344 nuclear pore re-assembly at the end of mitosis. **c.** Elys also restores nucleocytoplasmic trafficking

345 allowing import of cyclin-dependent kinases (CDKs) required for cell cycle progression. **d.** Elys plays

346 an active role in genome regulation through its direct interactions with components of large

347 molecular machineries including chromatin remodellers such as PBAP that favour transcription and

348 **e, f.** the MCM2-7 components of the DNA replication origin licensing system. **g.** After cell growth in

349 G2, **h.** the nuclear envelope breaks down and NPCs are disassembled upon entry into mitosis. Elys

350 relocates to kinetochores where **i.** it contributes to microtubule attachment and spindle formation.

351

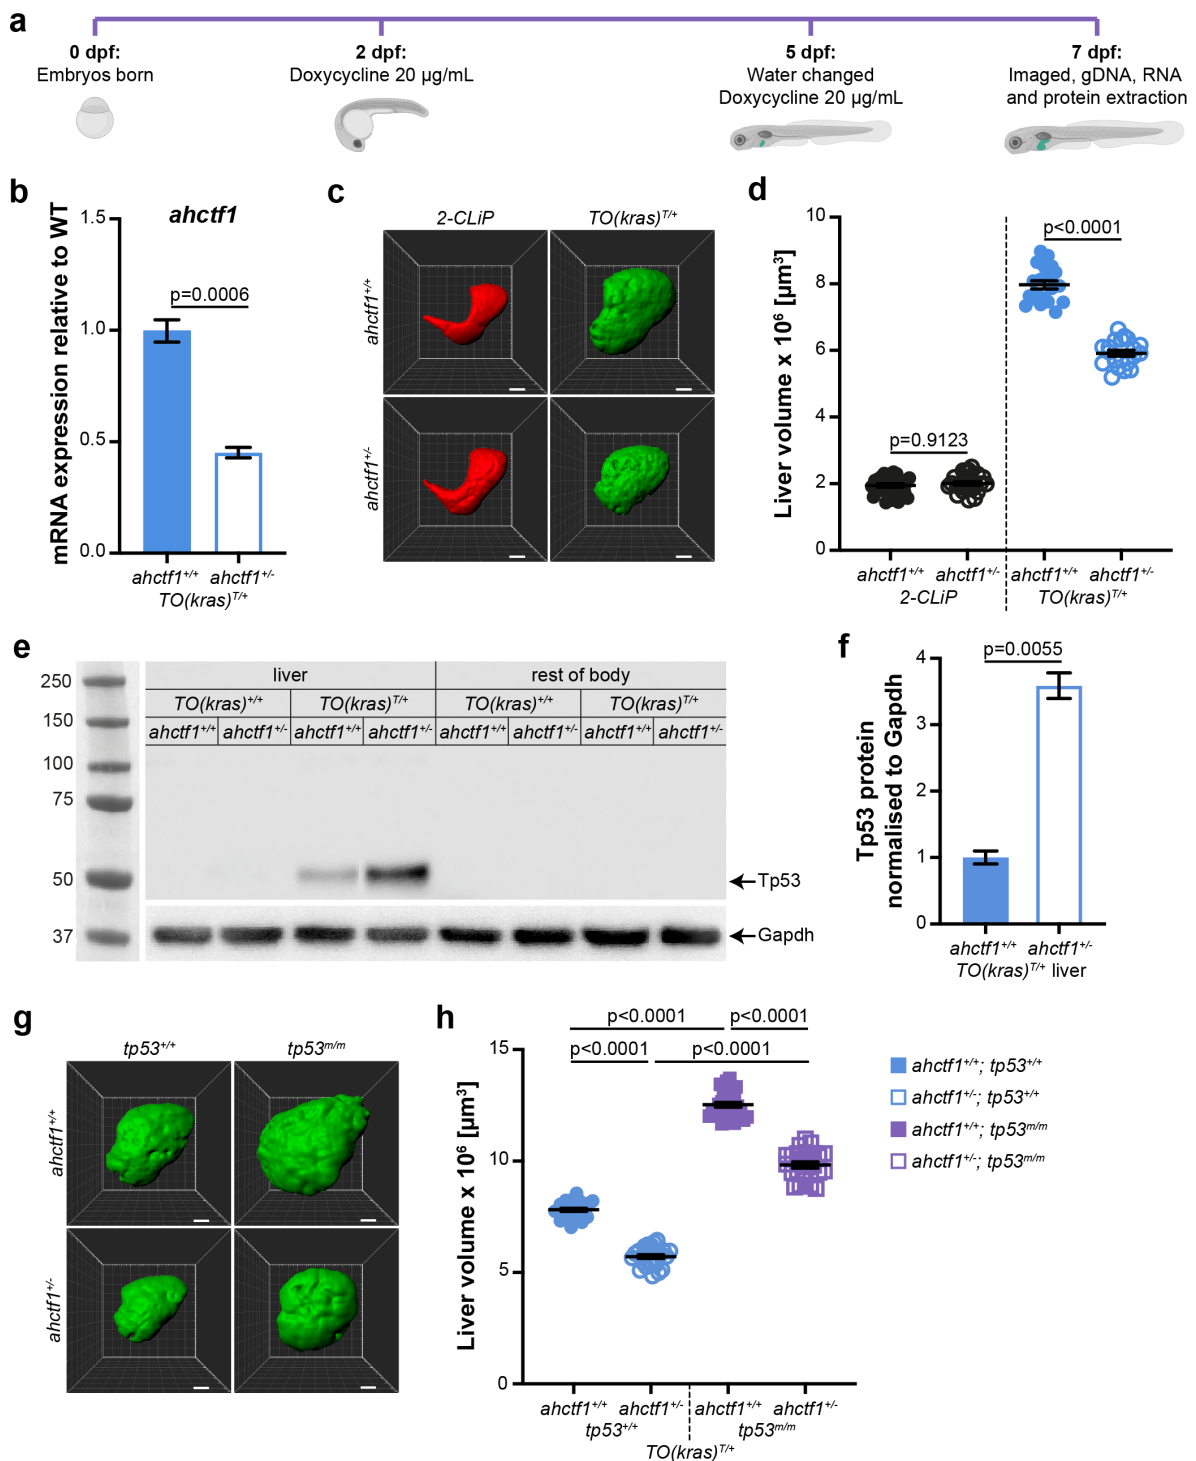

352

353 **Fig. 2** *ahctf1* heterozygosity reduces liver volume in a zebrafish *kras*<sup>G12V</sup>-driven model of

354 hepatocellular carcinoma in both Tp53 proficient and deficient larvae.

355 **a.** Protocol for doxycycline induction of *TO(kras*<sup>G12V</sup>*)*<sup>T/+</sup> expression in developing zebrafish larvae. **b.**

356 RT-qPCR analysis of *ahctf1* mRNA levels in pooled micro-dissected livers (n=3 biological replicates). **c.**

357 Representative three-dimensional reconstructions of 2-CLiP and *TO(kras*<sup>G12V</sup>*)*<sup>T/+</sup> livers of the indicated

358 *ahctf1* genotype. Scale bar 25  $\mu$ m. **d.** Impact of *ahctf1* heterozygosity on liver volume in 2-*CLiP* and  
359 *TO(kras<sup>G12V</sup>)<sup>T/+</sup>* larvae (n $\geq$ 20). **e.** Representative western blot of Tp53 protein signals in lysates of  
360 *TO(kras<sup>G12V</sup>)<sup>T/+</sup>* larvae of the indicated *ahctf1* genotype. **f.** Quantification of Tp53 protein levels  
361 normalised by reference to the Gapdh loading control (n=3 independent experiments). **g.**  
362 Representative three-dimensional reconstructions of *TO(kras<sup>G12V</sup>)<sup>T/+</sup>* livers of the indicated *ahctf1* and  
363 *tp53* genotypes. Scale bar 25  $\mu$ m. **h.** Impact of *ahctf1* heterozygosity and homozygous *tp53* mutation  
364 on liver volume in 2-*CLiP* and *TO(kras<sup>G12V</sup>)<sup>T/+</sup>* larvae (n $\geq$ 20). Data are expressed as mean  $\pm$  SEM.  
365 Significance was calculated using a Student's t-test or one-way ANOVA with Tukey's multiple  
366 comparisons test.

367

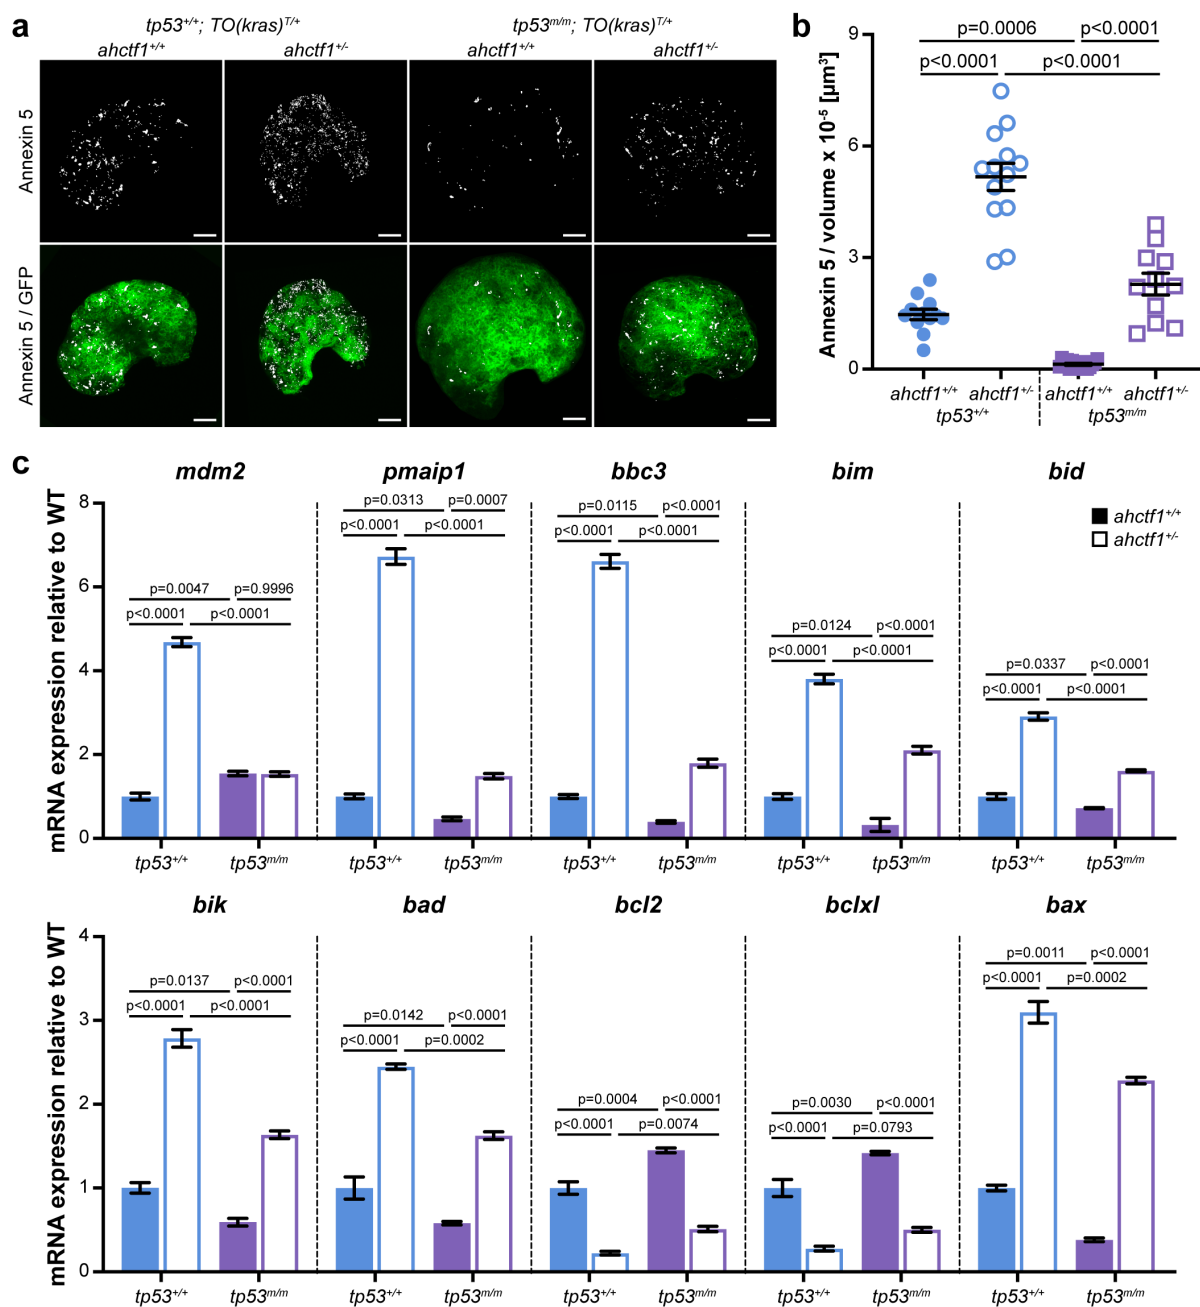

368

369 **Fig. 3** *ahctf1* heterozygosity increases cell death in *TO(kras<sup>G12V</sup>)<sup>T/+</sup>* hepatocytes in both **Tp53**

370 **proficient and deficient larvae.**

371 **a.** Representative maximum intensity projection images of Annexin 5-mKate fluorescence (white

372 puncta), indicating cells undergoing apoptosis in *TO(kras<sup>G12V</sup>)<sup>T/+</sup>* livers of the indicated *ahctf1* and

373 *tp53* genotypes. Scale bar 25 µm. **b.** Quantification of the density of Annexin 5 fluorescent foci in

374 *TO(kras<sup>G12V</sup>)<sup>T/+</sup>* livers of the indicated *ahctf1* and *tp53* genotypes (n≥11). **c.** RT-qPCR analysis of the

375 specified mRNAs in *TO(kras<sup>G12V</sup>)<sup>T/+</sup>* micro-dissected livers of the indicated *ahctf1* and *tp53* genotypes

376 (n=3 biological replicates). Data are expressed as mean  $\pm$  SEM. Significance was calculated using a  
377 one-way ANOVA with Tukey's multiple comparisons test.

378

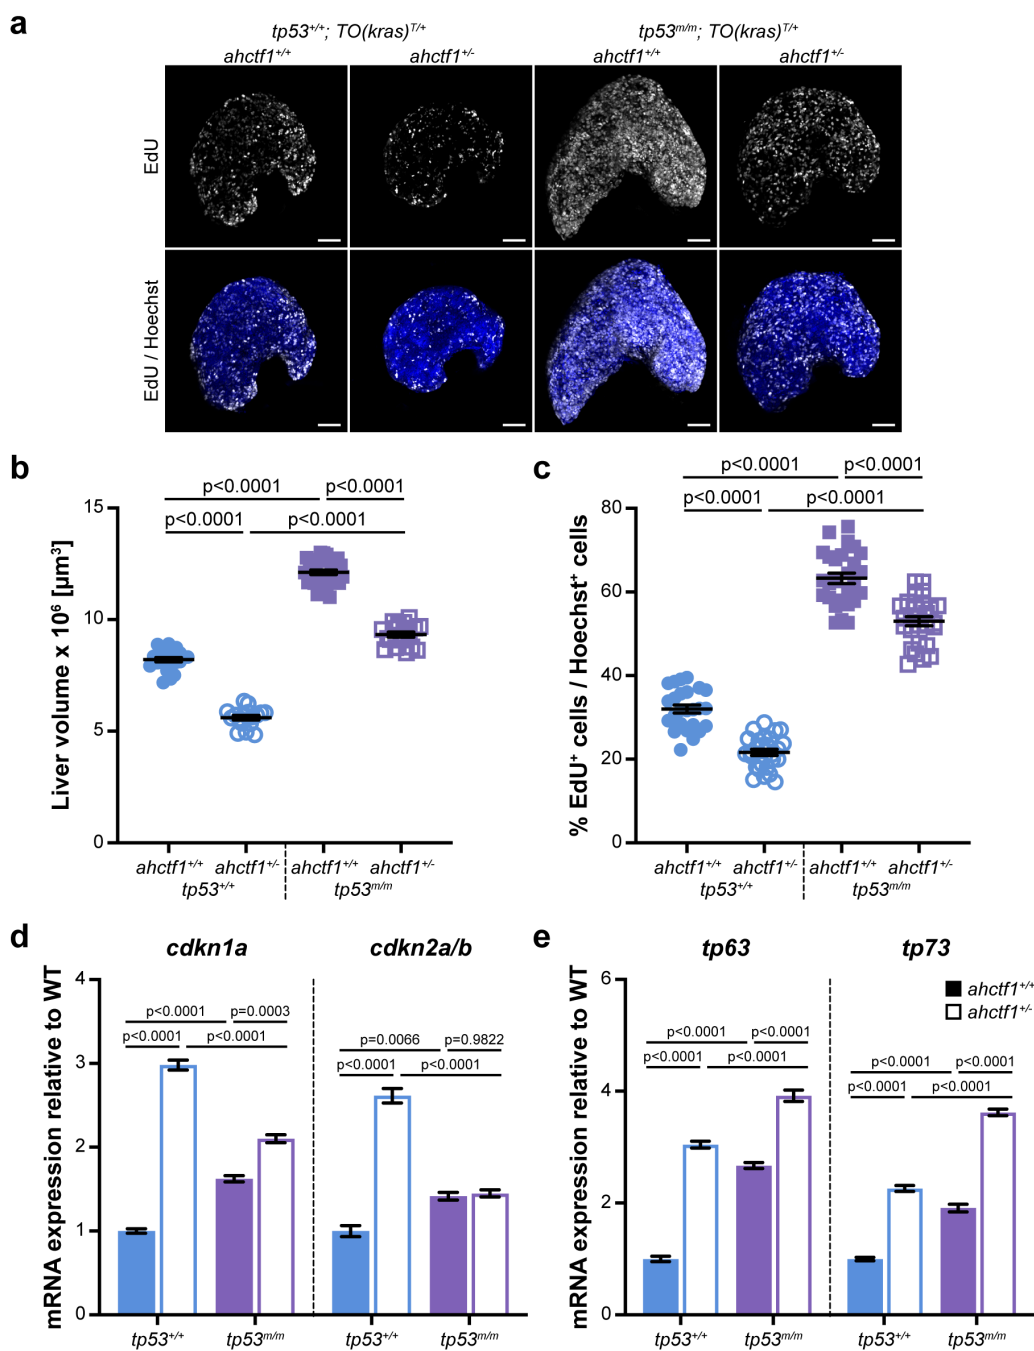

379

380 **Fig. 4 *ahctf1* heterozygosity restricts DNA replication in *TO(kras<sup>G12V</sup>)<sup>T/+</sup> hepatocytes.***

381 **a.** Representative maximum intensity projection images of EdU incorporation (white puncta) into

382 *TO(kras<sup>G12V</sup>)<sup>T/+</sup> livers of the indicated *ahctf1* and *tp53* genotypes. Scale bar 25 μm. **b.** Impact of*

383 *ahctf1* heterozygosity and homozygous *tp53* mutation on liver volume in 2-CLiP and *TO(kras<sup>G12V</sup>)<sup>T/+</sup>*

384 larvae (n≥17). **c.** Quantification of the percentage of EdU positive nuclei per Hoechst 43332 positive

385 nuclei (n≥25). **d.** RT-qPCR analysis of mRNA expression of the cell cycle regulators, *cdkn1a* and

386 *cdkn2a/b* and e. *tp63* and *tp73* in *TO(kras<sup>G12V</sup>)<sup>T/+</sup>* micro-dissected livers of the indicated *ahctf1* and  
387 *tp53* genotypes (n=3 biological replicates). Data are expressed as mean  $\pm$  SEM. Significance was  
388 calculated using a one-way ANOVA with Tukey's multiple comparisons test.

389

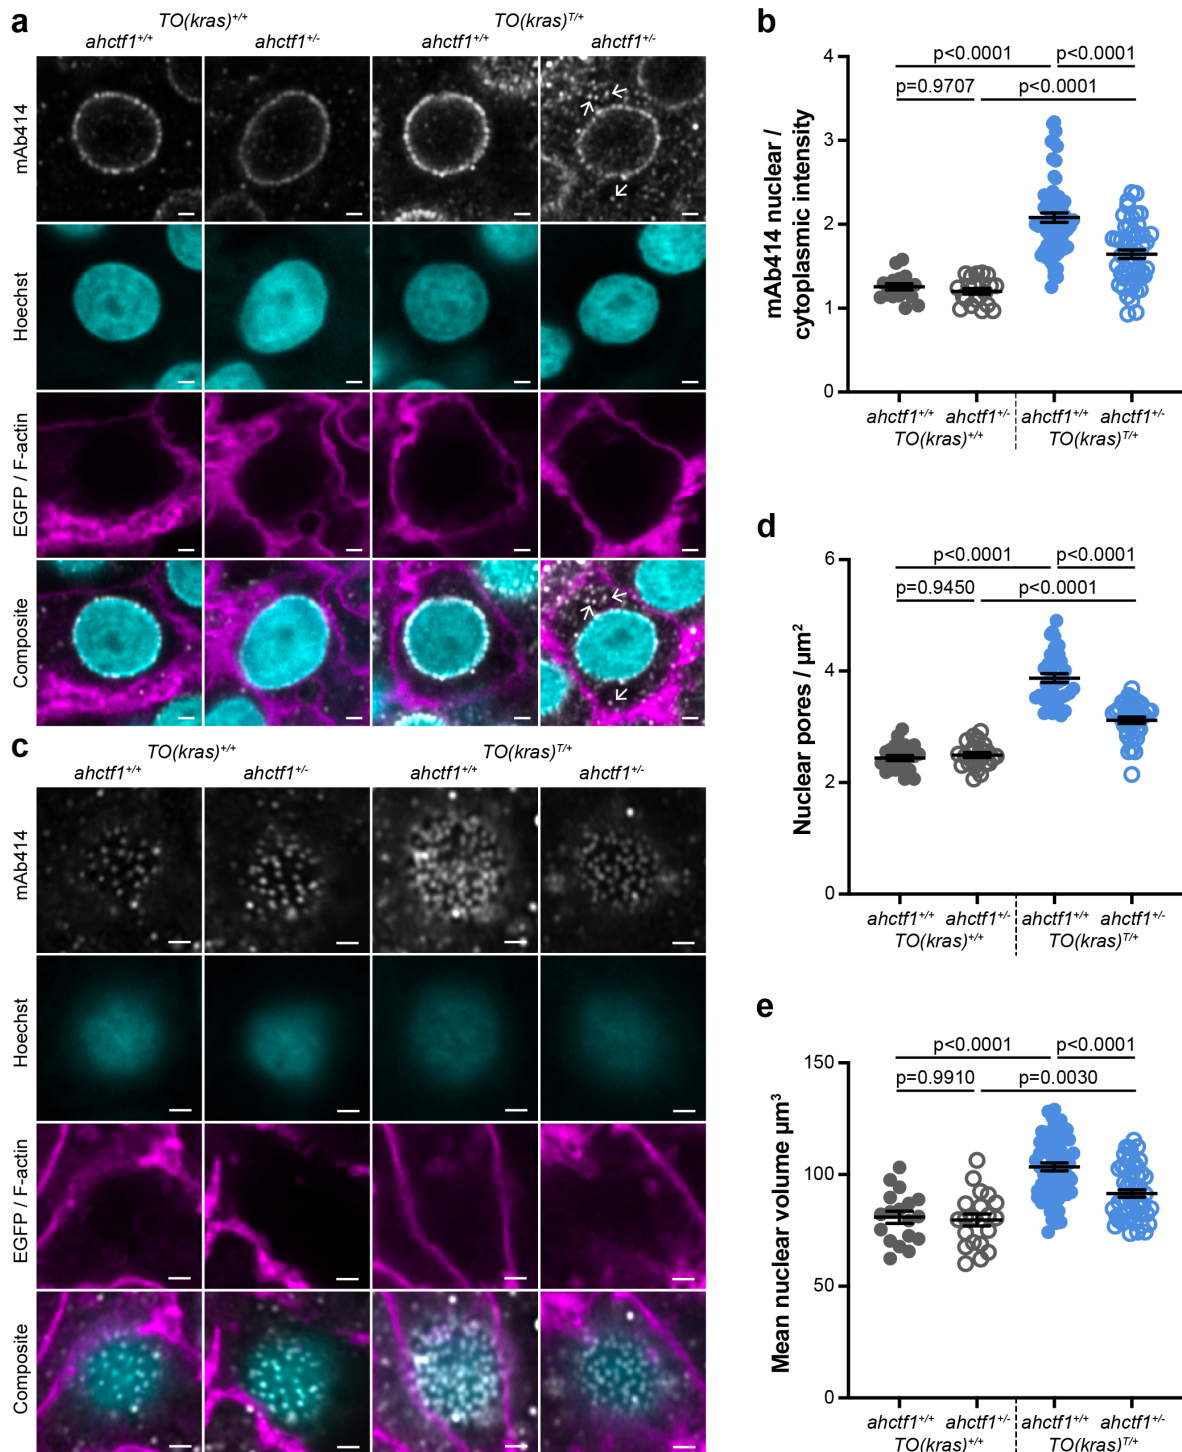

390

391 **Fig. 5** *ahctf1* heterozygosity disrupts nuclear pore complexes in *TO(kras<sup>G12V</sup>)<sup>T/+</sup>* hepatocytes.

392 **a.** Representative Airyscan imaging of liver sections stained with mAb414 (white) marking FG-Nups,

393 Hoechst 43332 (cyan) marking DNA, and rhodamine phalloidin (magenta) marking the F-actin

394 cytoskeleton in non-*TO(kras<sup>G12V</sup>)*-expressing cells or EGFP-Kras<sup>G12V</sup> (magenta) marking the cell

395 membrane in *TO(kras<sup>G12V</sup>)*-expressing cells of the indicated *ahctf1* and *TO(kras<sup>G12V</sup>)* genotypes.



396 Arrows indicate mAb414/FG-nucleoporin staining in the cytoplasm. Scale bar 2  $\mu\text{m}$ . **b.** Quantification  
397 of mean nuclear/cytoplasmic fluorescence intensity of mAb414 staining after 3D segmentation and  
398 morphological filtering of nuclear and cytoplasmic areas ( $n>18$ ). **c.** Representative Airyscan images of  
399 mAb414 staining at the nuclear surface of sections of the indicated *ahctf1* and *TO(kras<sup>G12V</sup>)*  
400 genotype. Scale bar 1  $\mu\text{m}$ . **d.** Quantification of nuclear pore density ( $n\geq 25$ ). **e.** Quantification of  
401 nuclear volume ( $n\geq 25$ ). Data are expressed as mean  $\pm$  SEM. Significance was calculated using a one-  
402 way ANOVA with Tukey's multiple comparisons test.

403

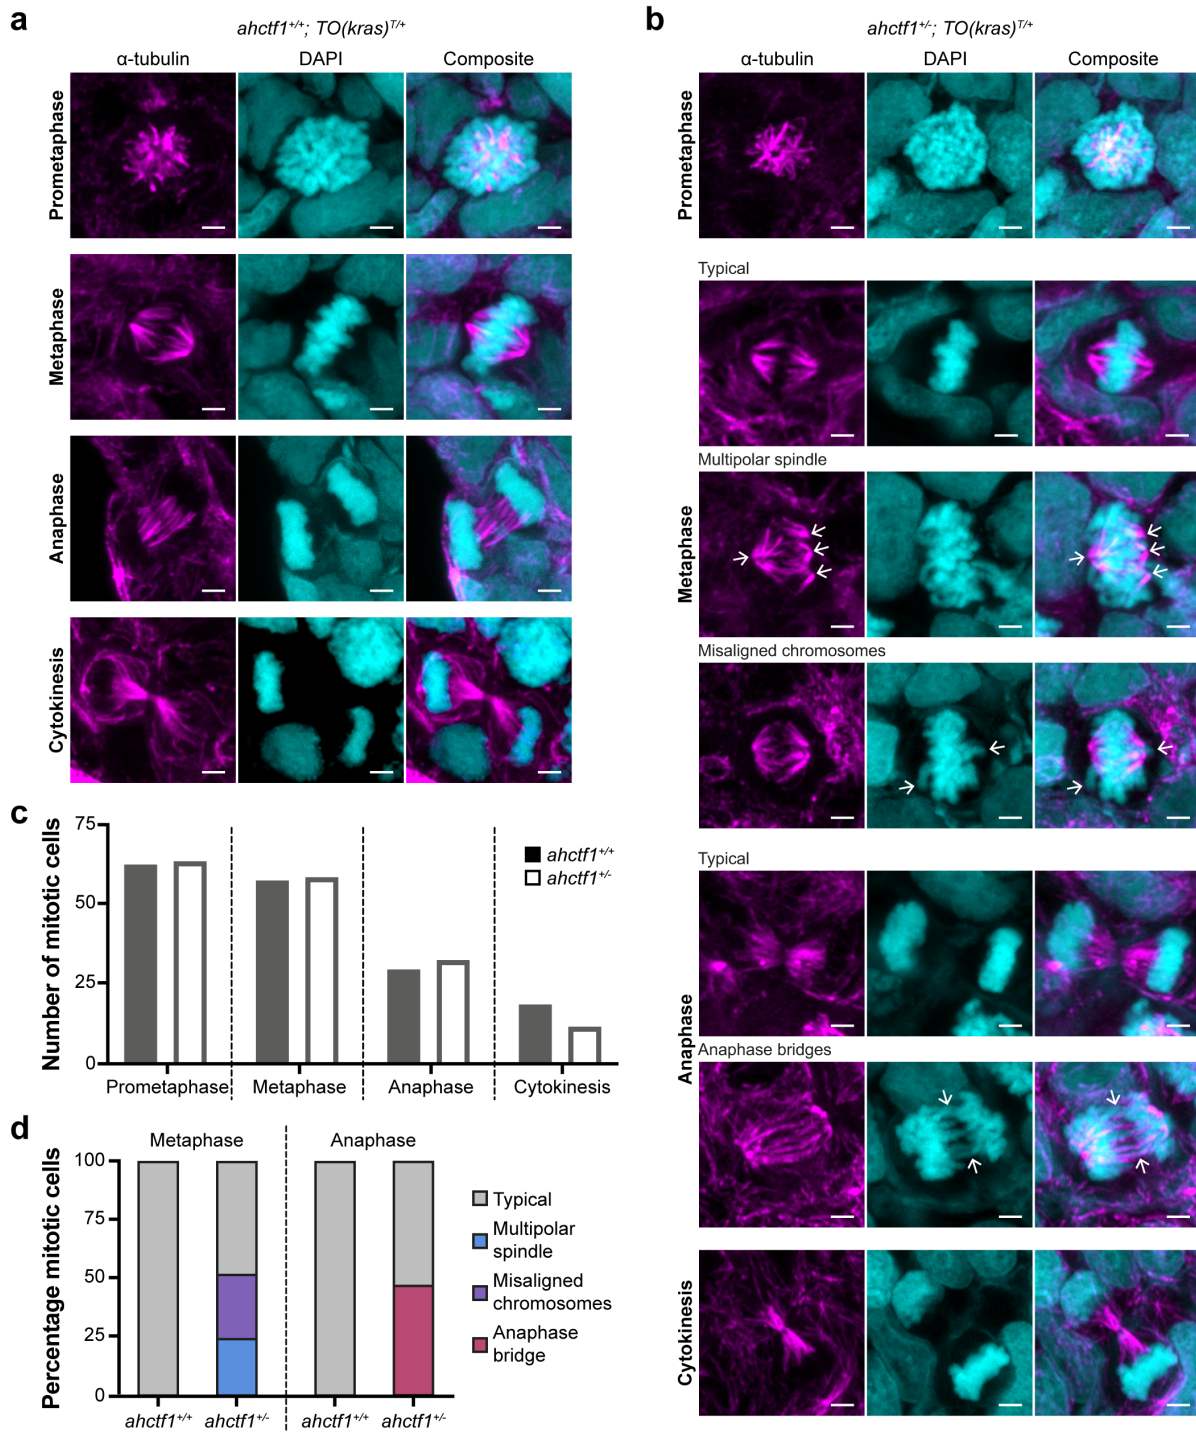

404

405 **Fig. 6 *ahctf1* heterozygosity impairs mitotic spindle assembly and chromosome segregation in**

406 ***TO(kras<sup>G12V</sup>)<sup>T/+</sup> hepatocytes.***

407 **a.** Representative Airyscan imaging of liver cryosections stained with  $\alpha$ -tubulin antibody (magenta)

408 marking spindle microtubules and DAPI (cyan) marking DNA in mitotic cells of *TO(kras<sup>G12V</sup>)<sup>T/+</sup>* larvae

409 on a wildtype *ahctf1<sup>+/+</sup>* background. **b.** Mitotic cells in liver cryosections of *TO(kras<sup>G12V</sup>)<sup>T/+</sup>* larvae on a

410 heterozygous *ahctf1*<sup>+/-</sup> background exhibit multiple defects, including multipolar spindles, misaligned  
411 chromosomes and anaphase bridges (arrows). Scale bar 2  $\mu$ m. **c.** Distribution of cells observed at  
412 different mitotic stages (n=92 livers, 326 mitotic cells) **d.** Quantification of the percentage of mitotic  
413 hepatocytes exhibiting an aberrant phenotype (n=14-57).

414

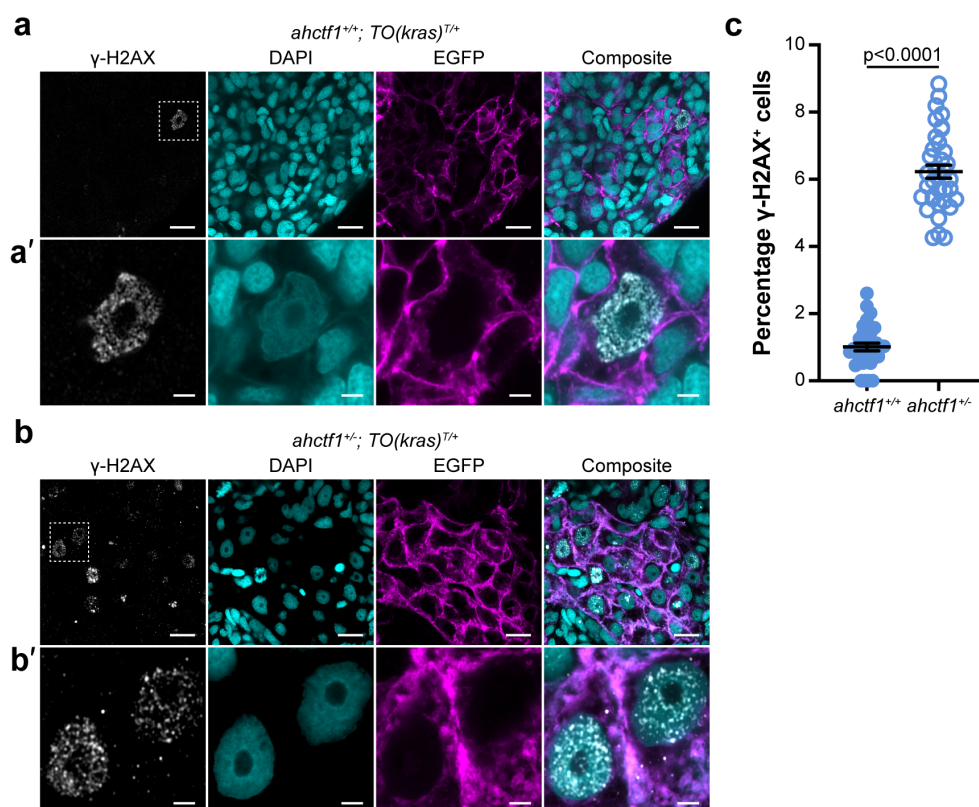

415

416 **Fig. 7** *ahctf1* heterozygosity leads to accumulation of DNA double-strand breaks in *TO(kras<sup>G12V</sup>)<sup>T/+</sup>*  
417 **hepatocytes.**

418 **a.** Representative Airyscan imaging of cryosections of liver from *ahctf1<sup>+/+</sup>; TO(kras<sup>G12V</sup>)<sup>T/+</sup>* larvae  
419 stained with  $\gamma$ -H2AX antibody (white) marking DNA double-strand breaks, DAPI (cyan) marking DNA  
420 and EGFP-Kras<sup>G12V</sup> (magenta) marking the cell membrane. Scale bar 5  $\mu$ m. **a'**. Inset of  $\gamma$ -H2AX positive  
421 nuclei in *ahctf1<sup>+/+</sup>; TO(kras<sup>G12V</sup>)<sup>T/+</sup>* hepatocytes. Scale bar 2  $\mu$ m. **b.** Representative images of  
422 cryosections of liver from *ahctf1<sup>+/-</sup>; TO(kras<sup>G12V</sup>)<sup>T/+</sup>* larvae. Scale bar 5  $\mu$ m. **b'**. Inset of  $\gamma$ -H2AX positive  
423 nuclei in cryosections of liver from *ahctf1<sup>+/-</sup>; TO(kras<sup>G12V</sup>)<sup>T/+</sup>* larvae. Scale bar 2  $\mu$ m. **c.** Quantification of  
424 the percentage of hepatocytes positive for  $\gamma$ -H2AX (n $\geq$ 31). Data are expressed as mean  $\pm$  SEM.  
425 Significance was calculated using a Student's t-test.

426

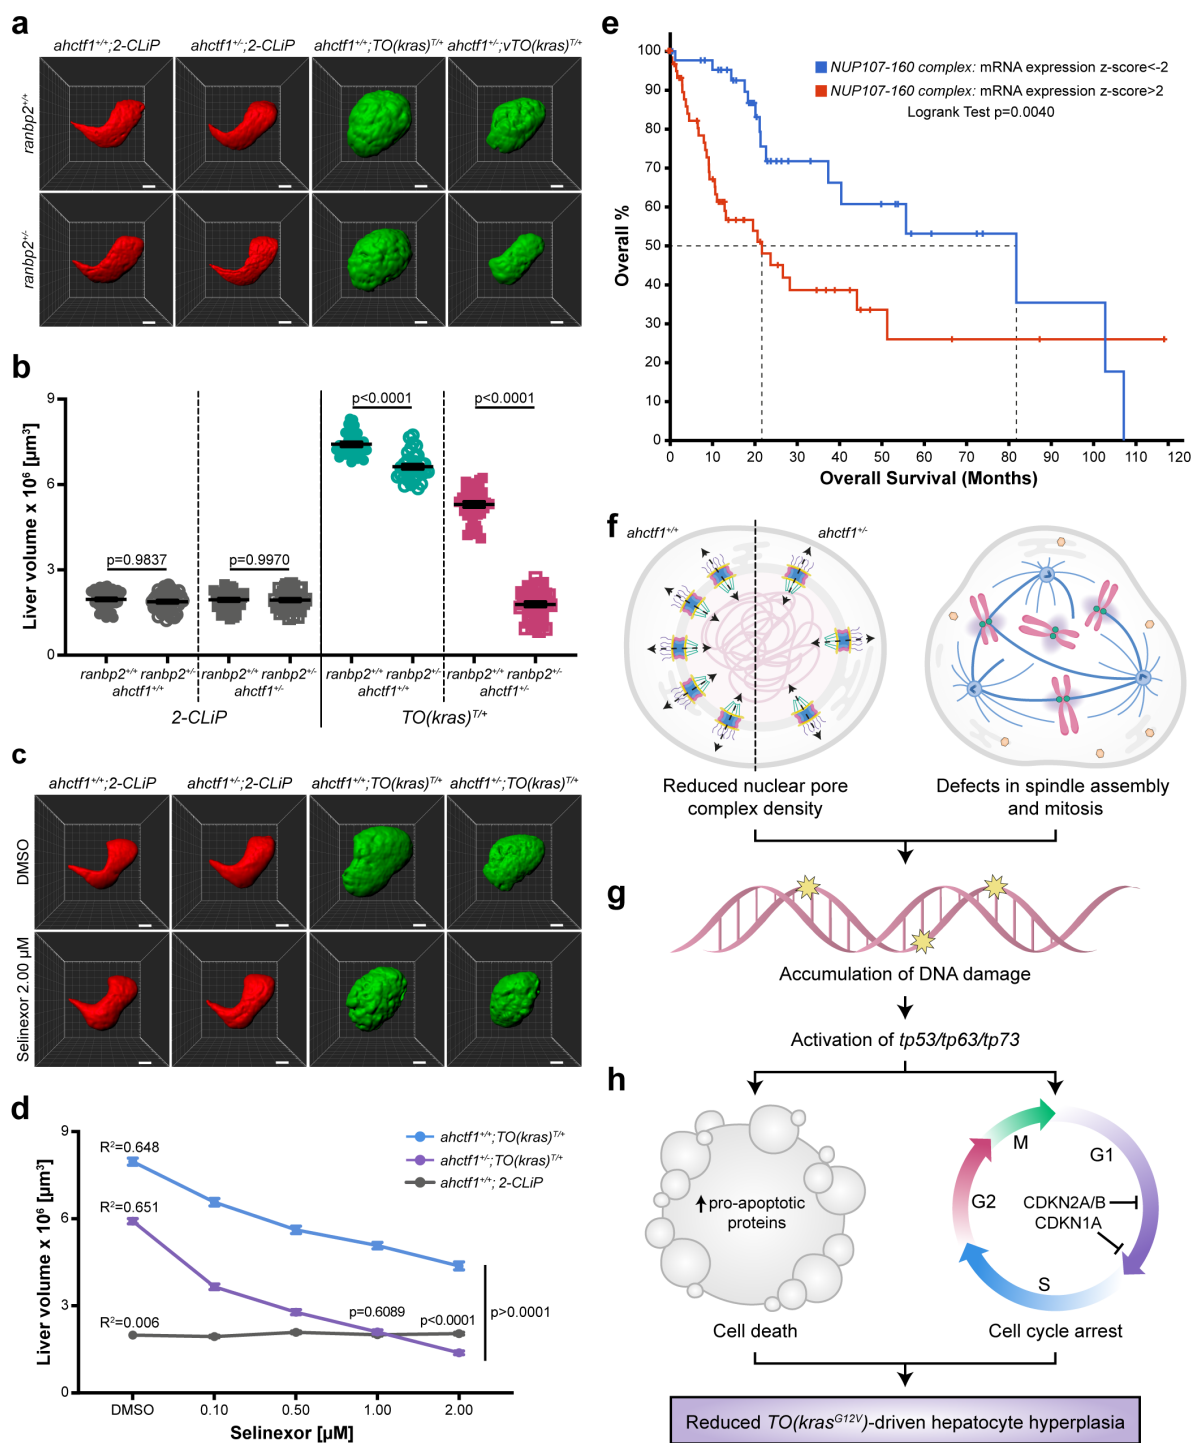

427

428 **Fig. 8 Combined approaches completely restrict  $kras^{G12V}$ -driven liver hyperplasia.**

429 **a.** Representative three-dimensional reconstructions of livers from *2-CLiP* and *TO(kras<sup>G12V</sup>)<sup>T/+</sup>* larvae  
 430 of the indicated *ahctf1* and *ranbp2* genotypes. Scale bar 25  $\mu$ m. **b.** Impact of *ahctf1* heterozygosity  
 431 and *ranbp2* heterozygosity on liver volume in *2-CLiP* and *TO(kras<sup>G12V</sup>)<sup>T/+</sup>* larvae ( $n \geq 30$ ). Significance  
 432 was calculated using a one-way ANOVA with Tukey's multiple comparisons test. **c.** Representative

433 three-dimensional reconstructions of  $TO(kras^{G12V})^{T/+}$  livers of the indicated *ahctf1* genotype treated  
434 with DMSO or 2.00  $\mu$ M Selinexor from 5-7 dpf. **d.** Dose-dependent impact of Selinexor treatment  
435 (0.10-2.00  $\mu$ M) on liver volume in *2-CLiP* (grey), *ahctf1<sup>+/+</sup>;TO(kras<sup>G12V</sup>)<sup>T/+</sup>* (blue) and *ahctf1<sup>+/-</sup>*  
436 *;TO(kras<sup>G12V</sup>)<sup>T/+</sup>* (purple) larvae ( $n \geq 20$ ). Data are expressed as mean  $\pm$  SEM. Significance was  
437 calculated by linear regression analysis. **e.** Overall survival of HCC patients with mRNA expression z-  
438 scores  $>2$  for one or more Nup107-160 complex components (red line; 63 cases); median overall  
439 survival 21.70 months. Overall survival of HCC patients with mRNA expression z-scores  $<-2$  for one or  
440 more Nup107-160 complex components (blue line; 45 cases); median overall survival 81.73 months.  
441 Data from the TCGA LIHC dataset (total 372 samples) available in the cBioPortal for Cancer  
442 Genomics. **f.** Schematic depiction of two of the processes disrupted by mild depletion of Elys protein  
443 culminating in **g.** DNA damage, activation of Tp53 transcription programs and **h.** cell death and cell  
444 cycle arrest of hyperproliferative  $Kras^{G12V}$ -expressing cancer cells.  
445

## 446 DISCUSSION

447 In this paper we show that *ahctf1* heterozygosity markedly reduces tumour burden in a genetically  
448 engineered zebrafish model of HCC. In this model of mutant *kras*-driven hepatocyte hyperplasia,  
449 *ahctf1* heterozygosity produces a reduction in the density of nuclear pores, aberrant chromatid  
450 separation during mitosis (Fig. 8f) and accumulation of DNA damage (Fig. 8g). We propose that these  
451 events combine to intensify the oncogene-induced stress sensed by cancer cells induced to hyper-  
452 proliferate by expression of the Kras<sup>G12V</sup> oncoprotein. We also show that the heightened levels of  
453 oncogene-induced stress caused by mild depletion of Elys protein provide a powerful stimulus to  
454 Tp53 activation. We observed increased abundance of Tp53 protein and enhanced transcription of  
455 Tp53 target genes, including *pmaip1* and *bbc3*, encoding two pro-apoptotic BH3-only Bcl2 family  
456 proteins (aka Noxa and Puma, respectively), and *cdkn1a* and *cdkn2a/b*, encoding the cell cycle arrest  
457 proteins, Cdkn1a/p21 and Cdkn2a/b/p16(Ink4a)/p14(Arf) (Fig 8h). Induced expression of these  
458 proteins is typically linked to increased apoptosis and cell cycle arrest. We found no evidence that  
459 mild depletion of Elys protein activated this sequence of events in unstressed, non-*kras*<sup>G12V</sup>-  
460 expressing cells.

461 Our results suggest that the promising therapeutic effect of inhibiting Elys function could be  
462 diminished in cancer cells lacking wild-type Tp53 protein. This is a clinically relevant issue since  
463 mutations in *TP53*, or amplification/overexpression of its negative regulators *MDM2/MDM4*, occur  
464 in 30% of HCC cases<sup>41</sup>. To investigate this further, we conducted experiments on a homozygous *tp53*  
465 mutant background. We found that *ahctf1* heterozygosity still produced a 24% reduction in tumour  
466 burden and induced cell death in the complete absence of Tp53 function, leading us to consider  
467 whether the loss of Tp53 function was compensated for by increased *tp63* and/or *tp73* expression.  
468 These genes encode Tp53 family proteins that share considerable structural homology with Tp53,  
469 particularly within the DNA binding domain, and can activate common and distinct sets of target  
470 genes to produce cell cycle arrest, senescence and apoptosis<sup>42,43</sup>. For example, in response to DNA  
471 damage, Tp63 induces senescence and apoptosis in the same way as Tp53, via transcriptional

472 induction of *cdkn1a*, *bbc3* and *pmaip1*<sup>44</sup>. We found that *ahctf1* heterozygosity upregulated *tp63* and  
473 *tp73* expression by 3.0-fold and 2.3-fold, respectively, and that this was further enhanced by *tp53*  
474 mutation. These results suggest a mechanism through which *ahctf1* heterozygosity achieves a  
475 reduction in tumour burden in the absence of Tp53 function. Since *TP63* and *TP73* are rarely  
476 mutated in cancer<sup>45</sup>, it is plausible that inhibition of ELYS function may still produce a beneficial  
477 effect on tumour growth in patients harbouring *TP53* mutations.

478 Dysregulation of nucleocytoplasmic transport is a common feature in a broad spectrum of cancers,  
479 usually arising from altered expression of nuclear pore components and/or nuclear transport  
480 receptors<sup>46</sup>. For example, overexpression of POM121, a transmembrane NPC component, enhances  
481 the nuclear import of the pro-proliferation transcription factors, E2F1, MYC and AR, and increases  
482 the therapeutic resistance of prostate cancer<sup>47</sup>. Similarly, the nuclear transport receptor XPO1 is  
483 frequently overexpressed in cancers, including HCC, and in this case leads to mis-localisation and  
484 inactivation of tumour suppressor proteins<sup>38,48</sup>. As a result, numerous selective inhibitors of nuclear  
485 export (SINEs) have been developed, including Selinexor (KPT-330), which has advanced through  
486 clinical trials and received FDA approval for the treatment of relapsed or refractory multiple  
487 myeloma and diffuse large B-cell lymphoma<sup>37</sup>. We found that Selinexor treatment in our zebrafish  
488 HCC model produced a dose-dependent reduction in tumour burden. Moreover, this therapeutic  
489 effect was strongly augmented by *ahctf1* heterozygosity, suggesting that new drugs targeting the  
490 ELYS protein could be combined effectively with drugs that target nucleocytoplasmic transport. We  
491 also exploited the genetic tractability of our zebrafish HCC model to show that trans heterozygosity  
492 of *ahctf1*, *ranbp2* delivers a synergistic reduction in liver volume/tumour burden, bringing it back to  
493 the volume of non-hyperplastic livers. Notably, non-*TO(kras<sup>G12V</sup>)* livers were completely unaffected  
494 by *ahctf1*, *ranbp2* trans heterozygosity, indicating a three-pronged synthetic lethal interaction in  
495 cancer cells that may be possible to recapitulate with combinatorial drug treatments.

496 There are several reasons why we think our *TO(kras<sup>G12V</sup>)* zebrafish HCC model provides a clinically  
497 relevant *in vivo* platform for the study of human cancer and the discovery of new therapeutic



498 strategies<sup>24</sup>. Firstly, RAS/RAF/MAPK signalling is almost always hyper-activated in human HCC<sup>49</sup>.  
499 Secondly, the progressive accumulation of histopathologic features including irregular nuclei,  
500 cytoplasmic vacuolation and increased vascularisation that are characteristic of tumour progression  
501 in HCC are reproduced in the zebrafish model<sup>50</sup>. Thirdly, comparative transcriptomic analysis reveals  
502 that the gene expression profile exhibited by oncogenic *kras*<sup>G12V</sup> hepatocytes isolated from larval  
503 zebrafish strongly resembles that of early-stage human HCC, with elevated expression of  
504 RAS/RAF/MAPK target genes such as *FGFR4*, *ETV4*, *EPHA2*, *DUSP6* and *SPRY* and DNA damage  
505 response genes *GADD45B*, *CCND1* and *H2AX1*<sup>51</sup>.

506 Our results compliment a growing body of evidence that carcinogenesis places persistently high  
507 demands on essential cellular genes, including those required for proper nuclear pore function,  
508 creating a vulnerability that may be therapeutically targeted without causing adverse effects on  
509 normal tissue<sup>52,53</sup>. For example, Sakuma *et al.* used siRNAs targeting 28 out of 32 Nup genes, to  
510 reduce the abundance of mature NPCs in the human melanoma-derived cell line, A375<sup>52</sup>. Focusing  
511 on two Nups exhibiting a severe reduction in NPC density, this study showed that NUP160 and  
512 NUP93 are essential for NPC assembly and that inhibiting this process results in cell death.  
513 Moreover, they found that cancer cells exhibited heightened susceptibility to inhibition of NPC  
514 assembly compared to human pulmonary fibroblasts and a normal cell line derived from retinal  
515 pigmental epithelium (RPE1), which instead underwent reversible cell cycle arrest. The differential  
516 sensitivity between cancer cells and normal cells to NPC assembly inhibition is consistent with  
517 reports that quiescent cells in normal tissues exist for many years with the same set of assembled  
518 NPCs and generally maintain low levels of Nup expression<sup>54,55</sup>.

519 The dynamic and diverse functions of ELYS require its binding to Nups and many other proteins,  
520 including components of kinetochore and replicative licensing complexes, as well as binding to  
521 chromatin in various states of condensation. The molecular topology of the ELYS protein and the  
522 structural basis for its diverse protein-protein and protein-chromatin interactions are hitherto poorly  
523 defined. Crystal structures of ELYS have shown that the  $\beta$ -propeller and  $\alpha$ -helical domains in the N-

524 terminal half of the ELYS protein bind to NUP160, and cryo-electron microscopy reveals the  
525 association of the ELYS C-terminal peptide with nucleosomes<sup>21,56</sup>. To advance our molecular  
526 understanding of the extent to which discrete domains within the ELYS protein contribute to tumour  
527 suppression, further high-resolution structural characterization is required. Hopefully, this will also  
528 reveal opportunities to inhibit distinct regions on the protein for the purpose of disabling ELYS  
529 function therapeutically. However, even if the topology of ELYS lacked features that would facilitate  
530 high affinity binding with small drug-like molecules, as was suggested for other Nups with scaffolding  
531 properties<sup>52</sup>, rapidly emerging technological advances in drug development are likely to provide  
532 alternative strategies to target the ELYS protein. For example, carefully controlled proteasomal  
533 degradation of proteins that participate in the oncogenic process with proteolysis targeting chimeras  
534 (PROTACs) is a rapidly advancing field in cancer therapy<sup>57</sup>. This approach depends on the availability  
535 of a ligand or 'warhead' to direct the PROTAC to the targeted protein, but this need not be a  
536 druggable site of protein-protein or protein-chromatin interaction, as is the case for small molecules  
537 designed to disrupt the function of the protein. In parallel, emerging small molecule RNA-targeting  
538 technology is on course to permit direct modulation of the abundance of specific RNA transcripts for  
539 a variety of clinical purposes<sup>58</sup>.

540 In summary, we assert that our *in vivo* cancer studies provide a strong and feasible rationale for  
541 targeting ELYS for the treatment of a broad spectrum of cancers. Moreover, our observations with  
542 RANBP2, indicate that our findings may be extrapolatable to other multi-functional Nups and  
543 provide a foundation for effective combinatorial treatments.

544

## 545 MATERIALS AND METHODS

### 546 Zebrafish maintenance and strains

547 Zebrafish were maintained at 28°C on a 12 h light/12 h dark cycle. The mutant lines *ahctf1*<sup>ti262</sup> and  
548 *tp53*<sup>M214K/M214K</sup> (also known as *tp53*<sup>e7/e7</sup> and referred to herein as *tp53*<sup>m/m</sup>) have been described  
549 previously<sup>7,26</sup>. Tg(*fabp10:dsRed, ela3l:GFP*)<sup>gz12</sup>, hereafter referred to as 2-CLiP, expresses dsRed in the  
550 liver and GFP in the exocrine pancreas but carries no oncogenic transgenes or mutations<sup>25</sup>. The  
551 Tg(*fabp10:rtTA2s-M2;TRE2:EGFP-kras*<sup>G12V</sup>)<sup>gz32</sup> line referred to as TO(*kras*<sup>G12V</sup>) and the cell death  
552 reporter line, Tg(*actb2:SEC-Hsa.ANXA5-mKate2,cryaa:mCherry*)<sup>uq24rp</sup> were described previously<sup>24,27</sup>.  
553 The *ranbp2*<sup>s452</sup> mutant line was generated in the Liver<sup>plus</sup> ENU mutagenesis screen<sup>32</sup>, and its genetic  
554 and morphological characterization is presented in this paper.

### 555 Inducing hepatocyte hyperplasia in transgenic zebrafish

556 To induce mutant *kras*<sup>G12V</sup> expression, TO(*kras*<sup>G12V</sup>) embryos were treated with 20 µg/mL doxycycline  
557 (Sigma, #D9891) at 2 dpf in E3 medium (5 mM NaCl, 0.17 mM KCl, 0.33 mM CaCl<sub>2</sub>, 0.33 mM MgSO<sub>4</sub>)  
558 with 0.003% 1-Phenyl-2-thiourea (PTU; Sigma, #P7629) to suppress pigmentation. E3 medium was  
559 changed at 5 dpf and fresh doxycycline (final conc. 20 µg/mL) added. For the Selinexor experiments,  
560 the drug (0.10-2.00 mM) (Karyopharm) or 0.001% DMSO (vehicle control) was added at 5 dpf.  
561 Morphological and molecular analyses were performed at 7 dpf. To quantitate liver volume, larvae  
562 were anaesthetized with benzocaine (200 mg/L) and mounted in 1% agarose. Image acquisition was  
563 performed using an Olympus FVMPE- RS multiphoton microscope with a 25x objective and Olympus  
564 FV30-SW software. Excitation wavelengths for GFP and RFP were 840 nm and 1100 nm, respectively.  
565 For volumetric analysis of whole livers, z-stacks with step-size 2 µm, were imported into ImageJ or  
566 Imaris software.

567

568 **Genotyping**

569 Genomic DNA (gDNA) was extracted from whole zebrafish larvae by incubation at 95°C in 50 µL of 50  
570 mM sodium hydroxide (NaOH) for 20 min, followed by neutralization with 5 µL of 1 M Tris-HCl (pH  
571 8.0). Primer sequences for genotyping are listed in Supplementary Table 1.

572 **mRNA expression analysis**

573 Total RNA was extracted from independent pools of micro-dissected zebrafish livers using the  
574 RNeasy Micro Kit (QIAGEN, #74004). RNA integrity was assessed by a High Sensitivity RNA  
575 ScreenTape assay (Agilent, #5067-5579) on a 2200 TapeStation. cDNA was generated from 1-10 µg  
576 RNA using the Superscript III First Strand Synthesis System (Invitrogen, #18080051) and oligo(dT)  
577 priming according to the manufacturer's instructions. RT-quantitative PCR (RT-qPCR) was performed  
578 using a SensiMix SYBR kit (Bioline, #QT605-05) on an Applied Biosystems ViiATM7 Real-Time PCR  
579 machine. Expression data were normalized by reference to *hrpt1*, *b2m* and *tbp*. LinRegPCR V11.0  
580 was used for baseline correction, PCR efficiency calculation and transcript quantification analysis<sup>59</sup>.  
581 Relative expression levels were calculated by the  $2^{-\Delta\Delta Ct}$  method and all results were expressed as the  
582 mean  $\pm$  SEM of three independent pools of biological replicates. Primer sequences are listed in  
583 Supplementary Table 2.

584 **Western blot analysis**

585 Pooled micro-dissected zebrafish livers were lysed in RIPA buffer (20mM Hepes, pH 7.9, 150mM  
586 NaCl, 1mM MgCl<sub>2</sub>, 1% NP40, 10mM NaF, 0.2mM Na<sub>3</sub>VO<sub>4</sub>, 10mM β-glycerol phosphate)  
587 supplemented with cOmplete Proteinase Inhibitor (Roche, #11836170001) and PhosTOP  
588 phosphatase inhibitors (Roche, #04906837001). Samples were incubated for 30 min on ice and the  
589 extracts cleared by centrifugation at 13,000 rpm for 20 min at 4°C. The protein concentration of  
590 samples was determined by BCA protein assay (Thermo Fisher Scientific, #23227). 25 µg of protein  
591 per lane were resolved on NuPAGE Novex Bis-Tris 4-12% polyacrylamide gels (Invitrogen,  
592 #NP0321BOX) and transferred onto nitrocellulose blotting membranes (Amersham Protran,

593 #10600003). Membranes were blocked with 5% BSA in PBS for 1 h at RT and incubated with primary  
594 antibodies 1:500 Anti-p53 (9.1) mouse mAb (Abcam, #ab77813) overnight at 4°C and 1:1000 Anti-  
595 GAPDH (14C10) Rabbit mAb (Cell Signalling Technology, #2118) for 1 h at RT. Secondary antibodies:  
596 Goat anti-mouse HRP (Dako, #P0447) and Goat anti-Rabbit HRP (Dako, #P0448), were used at 1:5000  
597 and incubated with membranes for 1 h at RT. Signals were developed using Amersham ECL Western  
598 Blotting Detection Kit (Cytiva, # RPN2108) and imaged on a Chemidoc Touch (Biorad). Relative  
599 protein quantitation was calculated based on normalized integrated intensity.

#### 600 **Cell death analysis**

601 To assess apoptosis, 7 dpf *TO(kras<sup>G12V</sup>);Annexin 5-mKate* zebrafish larvae were fixed in 4%  
602 paraformaldehyde (PFA) overnight at 4°C and livers isolated by micro-dissection. Image acquisition  
603 was performed using a Zeiss LSM 880 microscope with a 20x objective and ZEN software. Excitation  
604 wavelengths for mKate and GFP were 560 nm and 900 nm, respectively. Liver volume was quantified  
605 and 3D segmentation of Annexin 5-mKate signals were performed in ImageJ.

#### 606 **Cell cycle analysis**

607 EdU incorporation was used to assess the percentage of cells in S phase of the cell cycle. Briefly, live  
608 zebrafish larvae (7 dpf) were incubated at 28°C in 2 mM EdU (Invitrogen, #C10340) in E3 medium for  
609 2 h followed by a further incubation in fresh E3 medium for 1 h. Larvae were euthanised using  
610 benzocaine (1000 mg/L; Sigma, #PHR1158) prior to removal of the liver by micro-dissection. EdU  
611 labelling was carried out using the Click-iT Edu Alexa Fluor 647 (AF647) imaging kit (Invitrogen,  
612 #C10340), according to the manufacturer's instructions. The livers were co-stained with Hoechst  
613 33342 (Thermofisher, #62249). Image acquisition was performed using an Olympus FVMPE-RS  
614 multiphoton microscope with excitation wavelengths of 950 nm for Hoechst 33342 dye and 1160 nm  
615 for AF647 (Thermofisher, #A21235). The number of Hoechst 33342 and EdU positive cells was  
616 quantified using Arivis Vision4D software.

## 617 **Nuclear pore analysis**

618 Larvae fixed in 4% PFA overnight at 4°C were embedded in 4% low melting temperature agarose and  
619 transverse sections collected at 200 µm intervals using a vibrating microtome (Leica VT 1000S).  
620 Sections were blocked with 1% BSA in PBS/0.3% Triton X-100 and incubated with a 1:750 dilution of  
621 mAb414 (Abcam, #ab24609) at 4°C overnight. Sections were then incubated with 1:500 anti-mouse  
622 AF647 and Hoechst 33342 at room temperature for 1 h. Sections were mounted and imaged using a  
623 Zeiss LSM880 Fast Airyscan Confocal microscope with a 63x objective. 3D segmentation of cells was  
624 performed in ImageJ using EGFP signal for *TO(kras<sup>G12V</sup>)<sup>T/+</sup>* larvae or F-actin stained with 1:200  
625 rhodamine phalloidin for *TO(kras<sup>G12V</sup>)<sup>+/+</sup>* larvae. An outline was drawn around the nuclear periphery  
626 as segmented using Hoechst signal. mAb414 fluorescence intensity was calculated for the nuclear  
627 periphery and for the cytoplasm. NPC density was calculated by finding maxima for mAb414 at the  
628 nuclear surface of 5 nuclei per liver.

## 629 **Cryosectioning and immunofluorescence microscopy analysis**

630 Dissected livers were fixed in 4% PFA overnight at 4°C and washed with PBS/0.1% Tween 20 before  
631 incubation in 30% sucrose in PBS overnight at 4°C. Livers were aligned in a tissue mould, embedded  
632 in OCT and frozen on dry ice. The livers were sectioned at 10 µm intervals using a Thermofisher  
633 Scientific Microm HM550 cryostat. Sections were washed with PBS before blocking with 10% FCS in  
634 PBS/0.3% Triton X-100. Incubation with primary antibodies was performed at 4°C overnight, while  
635 incubation with secondary antibodies was performed at room temperature for 1 h. Antibodies used  
636 in this work were: 1:2000 α-Tubulin DM1A (CST, #3873), 1:1000 γ-H2AX (gift of James Amatruda),  
637 1:250 cleaved caspase 3 (CST, #9664), 1:500 anti-rabbit AF647 (Thermofisher scientific, #A31573)  
638 and 1:500 anti-mouse AF647 (Thermofisher, #A21235). Prolong Diamond Antifade reagent with DAPI  
639 (Thermofisher #P36962) was used for slide mounting. A Zeiss LSM880 Fast Airyscan Confocal  
640 microscope with a 63x objective was used for image acquisition and ImageJ for image analysis.

641 **Statistical analysis**

642 Data are expressed as mean  $\pm$  SEM unless indicated otherwise and the number of biological  
643 replicates indicating samples from individual animals/livers, or pools of individual animals/livers for  
644 each experiment are stated in the figure legends. P-values were calculated using Student's *t*-tests  
645 (two-tailed, followed by Welch's correction) when comparing two groups, and by ANOVA followed  
646 by Tukey's post-hoc test when comparing multiple groups. The effect of Selinexor treatment on liver  
647 volume was analysed by linear regression, regressing liver volume against Selinexor concentration.  
648 All analysis was performed using GraphPad Prism V7.03 (GraphPad software) and p-values  $\leq$  0.05  
649 were considered statistically significant.

650

651 **ACKNOWLEDGEMENTS**

652 The authors thank Tyson Blanch, Cameron Mackey, Elizabeth Grgacic and Bryan Ko (zebrafish  
653 husbandry), Ellen Tsui (histology), James Amatruda (rabbit polyclonal antibody to zebrafish  $\gamma$ -H2AX),  
654 Brendon Monahan and Leigh Coultas (insightful discussions).

655 **COMPETING INTERESTS**

656 The authors declare no competing financial interests.

657 **ADDITIONAL INFORMATION**

658 **FUNDING**

659 This work was funded by an Australian Government Research Training Program Scholarship and a  
660 WEHI Bridging Fellowship (to KM), the National Health and Medical Research Council of Australia  
661 (Grant 1024878 to JKH), Ludwig Cancer Research, a Victorian State Government Operational  
662 Infrastructure Support grant, and the Australian Government NHMRC Independent Research  
663 Institute Infrastructure Support Scheme.

664 **AUTHORS' CONTRIBUTIONS**

665 KM, KD, JKH conceived and designed the experiments; KM, KD, KS, BH, CS, GB, RM, ATP, TH, EO,  
666 DYRS, ZG, JKH developed the methodology; KM, KD, FG, LW, KS, BH, CS, GB, RM, ATP, JKH acquired  
667 and analysed the data; KM, KD and JKH wrote the manuscript; KD, JKH supervised the study; JKH  
668 acquired the funding.

669 **DATA AVAILABILITY**

670 The datasets generated and/or analysed during the current study are available in the cBioPortal  
671 Cancer Genomics database (<http://www.cbioportal.org>).

672



673 **REFERENCES**

- 674 1 Gao, S. & Lai, L. Synthetic lethality in drug development: the dawn is coming. *Future Med*  
675 *Chem* **10**, 2129-2132, doi:10.4155/fmc-2018-0227 (2018).
- 676 2 Lord, C. J. & Ashworth, A. PARP inhibitors: Synthetic lethality in the clinic. *Science* **355**, 1152-  
677 1158, doi:10.1126/science.aam7344 (2017).
- 678 3 Luo, J. *et al.* A genome-wide RNAi screen identifies multiple synthetic lethal interactions with  
679 the Ras oncogene. *Cell* **137**, 835-848, doi:10.1016/j.cell.2009.05.006 (2009).
- 680 4 Wang, T. *et al.* Gene Essentiality Profiling Reveals Gene Networks and Synthetic Lethal  
681 Interactions with Oncogenic Ras. *Cell* **168**, 890-903 e815, doi:10.1016/j.cell.2017.01.013  
682 (2017).
- 683 5 Solimini, N. L., Luo, J. & Elledge, S. J. Non-oncogene addiction and the stress phenotype of  
684 cancer cells. *Cell* **130**, 986-988, doi:10.1016/j.cell.2007.09.007 (2007).
- 685 6 Okita, K. *et al.* Targeted disruption of the mouse ELYS gene results in embryonic death at  
686 peri-implantation development. *Genes Cells* **9**, 1083-1091, doi:10.1111/j.1365-  
687 2443.2004.00791.x (2004).
- 688 7 Chen, J. N. *et al.* Mutations affecting the cardiovascular system and other internal organs in  
689 zebrafish. *Development* **123**, 293-302 (1996).
- 690 8 de Jong-Curtain, T. A. *et al.* Abnormal nuclear pore formation triggers apoptosis in the  
691 intestinal epithelium of elys-deficient zebrafish. *Gastroenterology* **136**, 902-911,  
692 doi:10.1053/j.gastro.2008.11.012 (2009).
- 693 9 Davuluri, G. *et al.* Mutation of the zebrafish nucleoporin elys sensitizes tissue progenitors to  
694 replication stress. *PLoS Genet* **4**, e1000240, doi:10.1371/journal.pgen.1000240 (2008).
- 695 10 Rasala, B. A., Orjalo, A. V., Shen, Z., Briggs, S. & Forbes, D. J. ELYS is a dual  
696 nucleoporin/kinetochore protein required for nuclear pore assembly and proper cell  
697 division. *Proceedings of the National Academy of Sciences of the United States of America*  
698 **103**, 17801-17806, doi:10.1073/pnas.0608484103 (2006).

- 699 11 Gillespie, P. J., Khoudoli, G. A., Stewart, G., Swedlow, J. R. & Blow, J. J. ELYS/MEL-28  
700 chromatin association coordinates nuclear pore complex assembly and replication licensing.  
701 *Curr Biol* **17**, 1657-1662, doi:10.1016/j.cub.2007.08.041 (2007).
- 702 12 Franz, C. *et al.* MEL-28/ELYS is required for the recruitment of nucleoporins to chromatin  
703 and postmitotic nuclear pore complex assembly. *EMBO reports* **8**, 165-172,  
704 doi:10.1038/sj.embor.7400889 (2007).
- 705 13 Beck, M. & Hurt, E. The nuclear pore complex: understanding its function through structural  
706 insight. *Nature reviews. Molecular cell biology* **18**, 73-89, doi:10.1038/nrm.2016.147 (2017).
- 707 14 Hodgson, B., Li, A., Tada, S. & Blow, J. J. Geminin becomes activated as an inhibitor of  
708 Cdt1/RLF-B following nuclear import. *Curr Biol* **12**, 678-683, doi:10.1016/s0960-  
709 9822(02)00778-9 (2002).
- 710 15 Kuhn, T. M., Pascual-Garcia, P., Gozalo, A., Little, S. C. & Capelson, M. Chromatin targeting of  
711 nuclear pore proteins induces chromatin decondensation. *J Cell Biol* **218**, 2945-2961,  
712 doi:10.1083/jcb.201807139 (2019).
- 713 16 Guttinger, S., Laurell, E. & Kutay, U. Orchestrating nuclear envelope disassembly and  
714 reassembly during mitosis. *Nature reviews. Molecular cell biology* **10**, 178-191,  
715 doi:10.1038/nrm2641 (2009).
- 716 17 Chatel, G. & Fahrenkrog, B. Nucleoporins: leaving the nuclear pore complex for a successful  
717 mitosis. *Cell Signal* **23**, 1555-1562, doi:10.1016/j.cellsig.2011.05.023 (2011).
- 718 18 Mishra, R. K., Chakraborty, P., Arnaoutov, A., Fontoura, B. M. & Dasso, M. The Nup107-160  
719 complex and gamma-TuRC regulate microtubule polymerization at kinetochores. *Nat Cell*  
720 *Biol* **12**, 164-169, doi:10.1038/ncb2016 (2010).
- 721 19 Orjalo, A. V. *et al.* The Nup107-160 nucleoporin complex is required for correct bipolar  
722 spindle assembly. *Mol Biol Cell* **17**, 3806-3818, doi:10.1091/mbc.e05-11-1061 (2006).

- 723 20 Yokoyama, H. *et al.* The nucleoporin MEL-28 promotes RanGTP-dependent gamma-tubulin  
724 recruitment and microtubule nucleation in mitotic spindle formation. *Nat Commun* **5**, 3270,  
725 doi:10.1038/ncomms4270 (2014).
- 726 21 Kobayashi, W. *et al.* Structural and biochemical analyses of the nuclear pore complex  
727 component ELYS identify residues responsible for nucleosome binding. *Commun Biol* **2**, 163,  
728 doi:10.1038/s42003-019-0385-7 (2019).
- 729 22 Bilokapic, S. & Schwartz, T. U. Molecular basis for Nup37 and ELY5/ELYS recruitment to the  
730 nuclear pore complex. *Proceedings of the National Academy of Sciences of the United States*  
731 *of America* **109**, 15241-15246, doi:10.1073/pnas.1205151109 (2012).
- 732 23 Rasala, B. A., Ramos, C., Harel, A. & Forbes, D. J. Capture of AT-rich chromatin by ELYS  
733 recruits POM121 and NDC1 to initiate nuclear pore assembly. *Mol Biol Cell* **19**, 3982-3996,  
734 doi:10.1091/mbc.E08-01-0012 (2008).
- 735 24 Chew, T. W. *et al.* Crosstalk of Ras and Rho: activation of RhoA abates Kras-induced liver  
736 tumorigenesis in transgenic zebrafish models. *Oncogene* **33**, 2717-2727,  
737 doi:10.1038/onc.2013.240 (2014).
- 738 25 Korzh, S. *et al.* Requirement of vasculogenesis and blood circulation in late stages of liver  
739 growth in zebrafish. *BMC Dev Biol* **8**, 84, doi:10.1186/1471-213X-8-84 (2008).
- 740 26 Berghmans, S. *et al.* tp53 mutant zebrafish develop malignant peripheral nerve sheath  
741 tumors. *Proceedings of the National Academy of Sciences of the United States of America*  
742 **102**, 407-412, doi:10.1073/pnas.0406252102 (2005).
- 743 27 Hall, T. E. *et al.* Cellular rescue in a zebrafish model of congenital muscular dystrophy type  
744 1A. *NPJ Regen Med* **4**, 21, doi:10.1038/s41536-019-0084-5 (2019).
- 745 28 Joseph, J., Liu, S. T., Jablonski, S. A., Yen, T. J. & Dasso, M. The RanGAP1-RanBP2 complex is  
746 essential for microtubule-kinetochore interactions in vivo. *Curr Biol* **14**, 611-617,  
747 doi:10.1016/j.cub.2004.03.031 (2004).

- 748 29 Salina, D., Enarson, P., Rattner, J. B. & Burke, B. Nup358 integrates nuclear envelope  
749 breakdown with kinetochore assembly. *J Cell Biol* **162**, 991-1001,  
750 doi:10.1083/jcb.200304080 (2003).
- 751 30 Hashizume, C., Kobayashi, A. & Wong, R. W. Down-modulation of nucleoporin  
752 RanBP2/Nup358 impaired chromosomal alignment and induced mitotic catastrophe. *Cell*  
753 *Death Dis* **4**, e854, doi:10.1038/cddis.2013.370 (2013).
- 754 31 Vecchione, L. *et al.* A Vulnerability of a Subset of Colon Cancers with Potential Clinical Utility.  
755 *Cell* **165**, 317-330, doi:10.1016/j.cell.2016.02.059 (2016).
- 756 32 Ober, E. A., Verkade, H., Field, H. A. & Stainier, D. Y. Mesodermal Wnt2b signalling positively  
757 regulates liver specification. *Nature* **442**, 688-691, doi:10.1038/nature04888 (2006).
- 758 33 Leshchiner, I. *et al.* Mutation mapping and identification by whole-genome sequencing.  
759 *Genome Res* **22**, 1541-1548, doi:10.1101/gr.135541.111 (2012).
- 760 34 Voz, M. L. *et al.* Fast homozygosity mapping and identification of a zebrafish ENU-induced  
761 mutation by whole-genome sequencing. *PLoS One* **7**, e34671,  
762 doi:10.1371/journal.pone.0034671 (2012).
- 763 35 Boglev, Y. *et al.* Autophagy induction is a Tor- and Tp53-independent cell survival response  
764 in a zebrafish model of disrupted ribosome biogenesis. *PLoS Genet* **9**, e1003279,  
765 doi:10.1371/journal.pgen.1003279 (2013).
- 766 36 Markmiller, S. *et al.* Minor class splicing shapes the zebrafish transcriptome during  
767 development. *Proceedings of the National Academy of Sciences of the United States of*  
768 *America* **111**, 3062-3067, doi:10.1073/pnas.1305536111 (2014).
- 769 37 Jans, D. A., Martin, A. J. & Wagstaff, K. M. Inhibitors of nuclear transport. *Curr Opin Cell Biol*  
770 **58**, 50-60, doi:10.1016/j.ceb.2019.01.001 (2019).
- 771 38 Zheng, Y. *et al.* KPT-330 inhibitor of XPO1-mediated nuclear export has anti-proliferative  
772 activity in hepatocellular carcinoma. *Cancer Chemother Pharmacol* **74**, 487-495,  
773 doi:10.1007/s00280-014-2495-8 (2014).

- 774 39 Cerami, E. *et al.* The cBio cancer genomics portal: an open platform for exploring  
775 multidimensional cancer genomics data. *Cancer Discov* **2**, 401-404, doi:10.1158/2159-  
776 8290.CD-12-0095 (2012).
- 777 40 Gao, J. *et al.* Integrative analysis of complex cancer genomics and clinical profiles using the  
778 cBioPortal. *Sci Signal* **6**, pl1, doi:10.1126/scisignal.2004088 (2013).
- 779 41 Zucman-Rossi, J., Villanueva, A., Nault, J. C. & Llovet, J. M. Genetic Landscape and  
780 Biomarkers of Hepatocellular Carcinoma. *Gastroenterology* **149**, 1226-1239 e1224,  
781 doi:10.1053/j.gastro.2015.05.061 (2015).
- 782 42 Levrero, M. *et al.* The p53/p63/p73 family of transcription factors: overlapping and distinct  
783 functions. *J Cell Sci* **113 ( Pt 10)**, 1661-1670 (2000).
- 784 43 Suh, E. K. *et al.* p63 protects the female germ line during meiotic arrest. *Nature* **444**, 624-  
785 628, doi:10.1038/nature05337 (2006).
- 786 44 Kerr, J. B. *et al.* DNA damage-induced primordial follicle oocyte apoptosis and loss of fertility  
787 require TAp63-mediated induction of Puma and Noxa. *Mol Cell* **48**, 343-352,  
788 doi:10.1016/j.molcel.2012.08.017 (2012).
- 789 45 Dotsch, V., Bernassola, F., Coutandin, D., Candi, E. & Melino, G. p63 and p73, the ancestors  
790 of p53. *Cold Spring Harb Perspect Biol* **2**, a004887, doi:10.1101/cshperspect.a004887 (2010).
- 791 46 Kau, T. R., Way, J. C. & Silver, P. A. Nuclear transport and cancer: from mechanism to  
792 intervention. *Nat Rev Cancer* **4**, 106-117, doi:10.1038/nrc1274 (2004).
- 793 47 Rodriguez-Bravo, V. *et al.* Nuclear Pores Promote Lethal Prostate Cancer by Increasing  
794 POM121-Driven E2F1, MYC, and AR Nuclear Import. *Cell* **174**, 1200-1215 e1220,  
795 doi:10.1016/j.cell.2018.07.015 (2018).
- 796 48 Hill, R., Cautain, B., de Pedro, N. & Link, W. Targeting nucleocytoplasmic transport in cancer  
797 therapy. *Oncotarget* **5**, 11-28, doi:10.18632/oncotarget.1457 (2014).
- 798 49 Calvisi, D. F. *et al.* Ubiquitous activation of Ras and Jak/Stat pathways in human HCC.  
799 *Gastroenterology* **130**, 1117-1128, doi:10.1053/j.gastro.2006.01.006 (2006).

- 800 50 Zheng, W. *et al.* Xmrk, kras and myc transgenic zebrafish liver cancer models share  
801 molecular signatures with subsets of human hepatocellular carcinoma. *PLoS One* **9**, e91179,  
802 doi:10.1371/journal.pone.0091179 (2014).
- 803 51 Huo, X. *et al.* Transcriptomic analyses of oncogenic hepatocytes reveal common and  
804 different molecular pathways of hepatocarcinogenesis in different developmental stages  
805 and genders in kras(G12V) transgenic zebrafish. *Biochem Biophys Res Commun* **510**, 558-  
806 564, doi:10.1016/j.bbrc.2019.02.008 (2019).
- 807 52 Sakuma, S. *et al.* Inhibition of Nuclear Pore Complex Formation Selectively Induces Cancer  
808 Cell Death. *Cancer Discov* **11**, 176-193, doi:10.1158/2159-8290.CD-20-0581 (2021).
- 809 53 Beck, M., Schirmacher, P. & Singer, S. Alterations of the nuclear transport system in  
810 hepatocellular carcinoma - New basis for therapeutic strategies. *J Hepatol* **67**, 1051-1061,  
811 doi:10.1016/j.jhep.2017.06.021 (2017).
- 812 54 D'Angelo, M. A., Raices, M., Panowski, S. H. & Hetzer, M. W. Age-dependent deterioration of  
813 nuclear pore complexes causes a loss of nuclear integrity in postmitotic cells. *Cell* **136**, 284-  
814 295, doi:10.1016/j.cell.2008.11.037 (2009).
- 815 55 Toyama, B. H. *et al.* Identification of long-lived proteins reveals exceptional stability of  
816 essential cellular structures. *Cell* **154**, 971-982, doi:10.1016/j.cell.2013.07.037 (2013).
- 817 56 Bilokapic, S. & Schwartz, T. U. Structural and functional studies of the 252 kDa nucleoporin  
818 ELYS reveal distinct roles for its three tethered domains. *Structure* **21**, 572-580,  
819 doi:10.1016/j.str.2013.02.006 (2013).
- 820 57 Ocana, A. & Pandiella, A. Proteolysis targeting chimeras (PROTACs) in cancer therapy. *J Exp*  
821 *Clin Cancer Res* **39**, 189, doi:10.1186/s13046-020-01672-1 (2020).
- 822 58 Mukherjee, H. *et al.* PEARL-seq: A Photoaffinity Platform for the Analysis of Small Molecule-  
823 RNA Interactions. *ACS Chem Biol* **15**, 2374-2381, doi:10.1021/acscchembio.0c00357 (2020).
- 824 59 Ruijter, J. M. *et al.* Amplification efficiency: linking baseline and bias in the analysis of  
825 quantitative PCR data. *Nucleic Acids Res* **37**, e45, doi:10.1093/nar/gkp045 (2009).
